1           **Local accessory gene sharing drives lineage-specific acquisition of**  
2                           **antimicrobial resistance in Egyptian *Campylobacter* spp.**

3  
4 Shaimaa F. Mouftah<sup>1\*</sup>, Ben Pascoe<sup>2,3\*</sup>, Jessica K. Calland<sup>2</sup>, Evangelos Mourkas<sup>2</sup>, Naomi Tonkin<sup>2</sup>,  
5 Charlotte Lefèvre<sup>2§</sup>, Danielle Deuker<sup>2§§</sup>, Sunny Smith<sup>2</sup>, Harry Wickenden<sup>2</sup>, Matthew D. Hitchings<sup>4</sup>,  
6 Samuel K. Sheppard<sup>2,5#</sup>, Mohamed Elhadidy<sup>1,6#</sup>

7  
8 <sup>1</sup>Biomedical Sciences Program, University of Science and Technology, Zewail City of  
9 Science and Technology, Giza, Egypt; <sup>2</sup>The Milner Centre of Evolution, University of Bath,  
10 Claverton Down, Bath, UK; <sup>3</sup>Chiang Mai University, Chiang Mai, Thailand; <sup>4</sup>Swansea University  
11 Medical School, Swansea University, Swansea, UK; <sup>5</sup>Department of Zoology, University of Oxford,  
12 Oxford, UK; <sup>6</sup>Department of Bacteriology, Mycology and Immunology, Faculty of Veterinary  
13 Medicine, Mansoura University, Mansoura, Egypt  
14

15 #Authors to which correspondence should be addressed: s.k.sheppard@bath.ac.uk;  
16 melhadidy@zewailcity.edu.eg

17 \*These authors contributed equally.

18 §Present address: Division of Virology, Department of Pathology, University of Cambridge, Tennis Court Road,  
19 Cambridge, United Kingdom.

20 §§Present address: Nuffield Department of Medicine, The Jenner Institute, University of Oxford, Oxford, United  
21 Kingdom.  
22

23 **Keywords:** *Campylobacter* / Population structure / Accessory genome / Antimicrobial resistance

24 **Repositories:** Short read data generated in this study are available on the NCBI Sequence Read  
25 Archive, associated with BioProject PRJNA576513  
26 (<https://www.ncbi.nlm.nih.gov/bioproject/PRJNA576513>).

## 27 **Abstract**

28 *Campylobacter* is the most common cause of bacterial gastroenteritis worldwide and diarrheal disease  
29 is a major cause of child morbidity, growth faltering and mortality in low- and middle-income  
30 countries (LMICs). Despite evidence of high incidence and differences in disease epidemiology, there  
31 is limited genomic data from studies in developing countries. In this study, we characterised the  
32 genetic diversity and accessory genome content of a collection of *Campylobacter* isolates from Cairo,  
33 Egypt. In total, 112 *Campylobacter* isolates were collected from broiler carcasses (n=31), milk and  
34 dairy products (n=24) and patients (n=57) suffering from gastroenteritis. Among the most common  
35 sequence types (STs) we identified were the globally disseminated, host generalist ST-21 clonal  
36 complex (CC21) and the poultry specialist CC206, CC464 and CC48. Notably, CC45 and the cattle-  
37 specialist CC42 were under-represented with a total absence of CC61. Comparative genomics were  
38 used to quantify core and accessory genome sharing among isolates from the same country compared  
39 to sharing between countries. Lineage-specific accessory genome sharing was significantly higher  
40 among isolates from the same country, particularly CC21 which demonstrated greater local  
41 geographical clustering. In contrast, no geographic clustering was noted in either the core or accessory  
42 genomes of the CC828, suggesting a highly admixed population. A greater proportion of *C. coli*  
43 isolates were multidrug resistant (MDR) compared to *C. jejuni*. This is a significant public health  
44 concern as MDR food chain pathogens are difficult to treat and often pose increased mortality risk  
45 demanding enhanced prevention strategies in the Egyptian market to combat such a threat.

46

## 47 **Impact statement**

48 *Campylobacter* is the leading bacterial cause of gastroenteritis worldwide and despite high incidence  
49 in low- and middle-income countries, where infection can be fatal, culture-based isolation is rare and  
50 the genotypes responsible for disease are seldom identified. Here, we sequenced the genomes of a  
51 collection of isolates from clinical cases and potential infection reservoirs from Cairo in Egypt and  
52 characterised their genetic diversity. Among the most common genotypes we identified were globally  
53 disseminated lineages implicated in human disease worldwide, including the host generalist ST-21  
54 clonal complex (CC21) and the poultry specialist genotypes CC206, CC464 and CC48. Notably  
55 however, some other globally common genotypes were under-represented or entirely absent from our  
56 collection, including those from cattle-specialist lineages, CC42 and CC61. By focussing on specific  
57 lineages, we demonstrate that there is increased accessory genome sharing in specific clonal  
58 complexes. This increased local sharing of genes may have contributed to a greater proportion of *C.*  
59 *coli* isolates possessing antimicrobial resistance determinants that suggest they could be multidrug  
60 resistant (MDR). This is a significant public health concern as MDR food chain pathogens are  
61 difficult to treat and often pose increased mortality risk demanding enhanced prevention strategies.

62

## 63 **Data summary**

64 Short read data are available on the NCBI Sequence Read Archive, associated with BioProject  
65 PRJNA576513 (<https://www.ncbi.nlm.nih.gov/bioproject/PRJNA576513>). Assembled genomes,  
66 supplementary material and additional analysis files are available from FigShare:  
67 <https://doi.org/10.6084/m9.figshare.9956597>. Phylogenetic trees can be visualised and manipulated  
68 on Microreact for *C. jejuni* ([https://next.microreact.org/project/Cjejuni\\_Egypt](https://next.microreact.org/project/Cjejuni_Egypt)) and *C. coli*  
69 ([https://next.microreact.org/project/Ccoli\\_Egypt](https://next.microreact.org/project/Ccoli_Egypt)) separately, or combined Cairo and Oxford data with  
70 additional PopPunk network clustering (<https://microreact.org/project/Campy-Egypt>).

71

## 72 Introduction

73 Diarrheal disease is a major cause of child morbidity, growth faltering and mortality in low- and  
74 middle-income countries (LMICs) (McCormick and Lang, 2016; Platts-Mills and Kosek, 2014).  
75 *Campylobacter* is the most common cause of bacterial gastroenteritis worldwide (Kaakoush et al.,  
76 2015) and typically human campylobacteriosis is commonly diagnosed as a disease associated with  
77 consumption of contaminated food, especially poultry (Nichols et al., 2012; Sheppard et al., 2009).  
78 Extremely high incidence in LMICs, high exposure rates (Lee et al., 2013) and endemism among  
79 young children suggests a different epidemiology (Kaakoush et al., 2015; Lanata et al., 2013; J. Liu et  
80 al., 2016). Frequent or chronic (re)infection is allied to significant morbidity, cognitive development  
81 impairment, and even death (Coker, 2002; Crofts et al., 2018; Kirk et al., 2018; Reed et al., 1996). In  
82 Egypt, campylobacteriosis is common and a leading cause of paediatric diarrhoea, with an incidence  
83 of 1.2 episodes per year (ElGendy et al., 2018; Rao, 2001) with up to 85% of children infected in their  
84 first year (Liu et al., 2012). Despite the high frequency of reported cases of *Campylobacter*-associated  
85 diarrhoea in Egypt (ElGendy et al., 2018), there are no detailed surveillance studies on the dominant  
86 sequence types and proliferation of genotypes associated with the onset of post-infectious sequelae,  
87 such as irritable bowel syndrome (PI-IBS), Guillain-Barré syndrome (GBS) or Miller  
88 Fisher syndrome (Wierzba et al., 2008).

89

90 *Campylobacter* species are often part of the gut microbiota of various wild and farmed animals  
91 leading to frequent contamination of human food products (Asuming-Bediako et al., 2019; Waite and  
92 Taylor, 2015). In Egypt, farming practices can lack adequate biosecurity and regulation. Only limited  
93 studies have reported the prevalence and distribution of *Campylobacter* in Egyptian  
94 campylobacteriosis cases (Kaakoush et al., 2015) and little is known of the dominant source reservoirs  
95 driving infection and transmission. In Europe, potential source reservoirs have been identified through  
96 source attribution studies, with poultry products regarded as the primary source of infection (Facciola  
97 et al., 2017; Mossong et al., 2016; Sheppard et al., 2009; Thépault et al., 2018). Host-adaptation of  
98 *Campylobacter* to a wide-range of hosts is reflected in its population structure (Colles and Maiden,

99 2012; Dearlove et al., 2016; Griekspoor et al., 2013; Méric et al., 2018; Sheppard et al., 2014), with  
100 many lineages common in human infection able to infect multiple host species. These host generalist  
101 lineages include *C. jejuni* ST-21, ST-45 clonal complexes and the *C. coli* ST-828 complex (Dearlove  
102 et al., 2016; Mossong et al., 2016). Other genotypes are only found in a single reservoir species, often  
103 associated with global poultry or cattle production. Host specialist clonal complexes common in  
104 human disease includes the poultry-associated ST-353, ST354 and ST257 (Berthenet et al., 2019;  
105 Sheppard et al., 2009) and cattle specialist ST-61 (French et al., 2005; Mourkas et al., 2019).

106

107 Human infection in developed countries is usually sporadic and self-limiting, not requiring treatment  
108 with antibiotics. However global rates of antimicrobial resistance are rising (Mourkas et al., 2019;  
109 Zhao et al., 2016) in line with other Gram negative gastrointestinal pathogens (Tam et al., 2012; CDC,  
110 2020). Widespread agricultural usage has driven the proliferation of tetracycline resistance through its  
111 use as a growth promoter (Abdi Hachesoo et al., 2014; Inglis et al., 2019). In particular, *C. coli* has  
112 shown an ability to acquire erythromycin resistance genes from other species (Mourkas et al., 2019).  
113 This has not been explored for Egyptian *Campylobacter* isolates, where agricultural antibiotic usage is  
114 poorly regulated (Dahshan et al., 2015) and self-medication for gastrointestinal disease is common  
115 (Abd El-Tawab et al., 2018; Sabry et al., 2014). Global differences in the use of quinolones is likely  
116 responsible for the geographical differences observed in quinolone resistance (Luangtongkum et al.,  
117 2009; Pascoe et al., 2017; Zollner-Schwetz and Krause, 2015).

118

119 We have sequenced 112 *Campylobacter* isolates collected from patients and food of animal source  
120 (i.e., broiler chicken carcasses and dairy products) in Cairo over a year to determine the most  
121 prevalent *Campylobacter* genotypes causing disease in Egypt. By screening the genome content,  
122 including known AMR determinants we provide a better understanding of the local population  
123 structure to guide disease intervention in Egypt. This study provides a basis for considering complex  
124 transmission networks in LMICs and highlights the role of globally transmitted *Campylobacter*  
125 lineages and the emergence of (horizontally acquired) antimicrobial resistance.

## 126 **Methods**

### 127 ***Ethical approval***

128 The study represents a retrospective study that involved sequencing the genomes of a historical strain  
129 collection and no patient data collection was involved in this study. Ethical approval was granted from  
130 the respective ethics committee in the Egyptian central directorate of research and health development  
131 before conducting the study.

132

### 133 ***Isolate collection***

134 In total, 112 *Campylobacter* isolates were collected in Cairo, Egypt from September 2017 to  
135 December 2018, including 31 isolates from broiler carcasses, 24 isolates from milk and dairy  
136 products, and 57 clinical isolates. Clinical isolates were recovered from stool samples of patients  
137 admitted to hospitals in downtown Cairo suffering from gastroenteritis symptoms. A questionnaire  
138 was distributed to all admitted patients requesting details on clinical presentation (e.g., duration of  
139 illness, symptoms, medication prescribed), dietary record of the previous 2 weeks, including  
140 consumption of specific or undercooked meats, unpasteurized milk, exposure to animal manure or  
141 faeces, and any retail outlets commonly used by patients for food consumption prior to the onset of  
142 illness. A random sampling approach was then used to include food samples from stores in the study  
143 region that were commonly listed in the questionnaire.

144

### 145 ***Sample culturing and whole genome sequencing***

146 The isolation and enumeration of *Campylobacter* strains from different food matrices was performed  
147 according to the ISO 10272-1 (Enrichment Method; Detection of *Campylobacter* spp. after Selective  
148 Enrichment). All isolates were sub-cultured from  $-80^{\circ}\text{C}$  frozen stocks onto Mueller-Hinton agar  
149 (Oxoid, United Kingdom). Plates were incubated at  $42 \pm 1^{\circ}\text{C}$  under anaerobic conditions using  
150 AnaeroGen™ 2.5L Sachets (Oxoid, United Kingdom). Genomic DNA was extracted from 112  
151 Egyptian isolates using the QIAamp DNA Mini Kit (QIAGEN, Crawley, UK), according to  
152 manufacturer's instructions and DNA concentrations were quantified using a Nanodrop

153 spectrophotometer before genome sequencing using an Illumina MiSeq (California, USA). Nextera  
154 XT libraries (Illumina, California, USA) were prepared following manufacturer's protocols and short  
155 paired-end reads were sequenced using 2×300 bp paired end v3 reagent kit (Illumina).

156

### 157 ***Genome datasets***

158 Genomes were assembled *de novo* using SPAdes (version 3.8.0; Bankevich et al. 2012). The average  
159 number of contigs was 72 (range: 12–471) for an average total assembled sequence size of 1.70 Mbp  
160 (range: 1.56–1.86). The average N50 contig length (L50) was 14,577 (range: 3,794–55,912) and the  
161 average GC content was 30.8 % (range: 30.5–31.6). Short read data are available on the NCBI short  
162 read archive (SRA), associated with BioProject PRJNA576513. Assembled genomes and  
163 supplementary material are available from FigShare (doi:10.6084/m9.figshare.9956597; individual  
164 accession numbers and assembled genome statistics in **Supplementary Table S1**). We augmented  
165 our collection by assembling a context dataset of previously published isolates (n=204) to represent  
166 the known diversity of *C. jejuni* and *C. coli* (Calland et al., 2020; Sheppard et al., 2010, 2013, 2014).  
167 In addition, we also compared our single city survey with a previously published survey from Oxford  
168 in the UK (n=874 isolates collected over 1 year; Cody et al. 2012). Isolate genomes were archived in  
169 BIGSdb and MLST sequence types (STs) derived through BLAST comparison with the pubMLST  
170 database (Dingle et al., 2001; Jolley et al., 2018; Jolley and Maiden, 2010; Sheppard et al., 2012).  
171 Simpson's index of ST diversity was calculated for the Cairo and Oxford datasets using the equation:

$$D = 1 - \frac{\sum n(n-1)}{N(N-1)}$$

172 Where *n* is the number of isolates of each sequence type and *N* is the total number of isolates  
173 (Grundmann et al., 2001).

174

### 175 ***Core and accessory genome characterisation***

176 Alignments were made from concatenated gene sequences of all core genes (found in ≥95% isolates)  
177 using MAFFT (version 7; Katoh and Standley 2013) on a gene-by-gene basis. Separate maximum-  
178 likelihood phylogenies were constructed with a GTR+I+G substitution model and ultra-fast

179 bootstrapping (1000 bootstraps) (Hoang et al., 2018) implemented in IQ-TREE (version 1.6.8;  
180 Nguyen et al. 2015) for *C. jejuni* (n=1,048) and *C. coli* (n=132) and visualized on Microreact  
181 ([https://next.microreact.org/project/Cjejuni\\_Egypt](https://next.microreact.org/project/Cjejuni_Egypt); [https://next.microreact.org/project/Ccoli\\_Egypt](https://next.microreact.org/project/Ccoli_Egypt))  
182 (Argimón et al., 2016).

183

184 All unique genes present in at least one isolate (the pangenome) were identified by automated  
185 annotation using PROKKA (version 1.13; Seemann 2014) followed by PIRATE, a pangenomics tool  
186 that allows for orthologue gene clustering in bacteria (Bayliss et al., 2019). We defined genes in  
187 PIRATE using a wide range of amino acid percentage sequence identity thresholds for Markov  
188 Cluster algorithm (MCL) clustering (45, 50, 60, 70, 80, 90, 95, 98). Genes in the pangenome were  
189 ordered initially using the NCTC 11168 reference followed by the order defined in PIRATE based on  
190 gene synteny and frequency (Gundogdu et al., 2007; Pascoe et al., 2019). As described previously, a  
191 matrix was produced summarizing the presence/absence and allelic diversity of every gene in the  
192 pangenome list, with core genes defined as present in 95% of the genomes and accessory genes as  
193 present in at least one isolate (**Supplementary table S2**) (Méric et al., 2014). Pairwise core and  
194 accessory genome distances were compared using PopPunk (version 2.2.0; Lees et al. 2019) which  
195 uses pairwise nucleotide k-mer comparisons to distinguish shared sequence and gene content to  
196 identify divergence of the accessory genome in relation to the core genome. A two-component  
197 Gaussian mixture model was used to construct a network to define clusters, comparable to other  
198 *Campylobacter* studies (Components: 41; density 0.0579; transitivity: 0.9518; score: 0.8907) (Pascoe  
199 et al. 2020).

200

201 Core genome variation between isolates was quantified by calculating the pairwise average nucleotide  
202 identity (ANI) of all (n=112+874) *Campylobacter* genomes using FastANI v.1.058 (Jain et al., 2018).  
203 The gene presence matrix produced by PIRATE was used to generate a heatmap of shared pairwise  
204 accessory genome genes. Averages were calculated for within and between country comparisons in  
205 addition to focussed analysis on the ST21 (*C. jejuni*) and ST828 (*C. coli*) clonal complexes.  
206 Antimicrobial resistance genes and putative virulence genes were detected through comparison with



207 reference nucleotide sequences using ABRicate (version 0.8) (<https://github.com/tseemann/abricate>)  
208 and the NCBI database (Chen et al., 2005; NCBI Resource Coordinators, 2013). Point mutations  
209 related to antibiotic resistance genes were identified by PointFinder (Zankari et al., 2017) using the  
210 STAR-AMR software package (<https://github.com/phac-nml/staramr>) (**Supplementary table S3**).  
211

## 212 Results

### 213 *Globally circulating genotypes among Egyptian Campylobacter isolates*

214 We sequenced and characterized a collection of *Campylobacter spp.* isolates (n=112) from clinical  
215 cases, broiler carcasses and dairy products collected over a 14-month sampling period in Cairo, Egypt  
216 (**Figure 1A; Supplementary table S1**). Isolate genotypes were compared with all genomes deposited  
217 in the pubMLST database (97,012 profiles, data accessed 17<sup>th</sup> February 2020) and ranked according to  
218 how frequently they were found associated with human disease (**Figure 1B**). Egyptian *C. jejuni*  
219 isolates belonged to 15 clonal complexes (CCs) with a diverse assemblage of STs. Nearly half of the  
220 isolates (n = 29, 47%) were from common lineages, isolated many times before and recorded in  
221 pubMLST (>50 MLST profiles; **Figure 1B**), including the globally disseminated lineages of ST-  
222 21CC (n=37; 41%), ST-206 CC (n=10; 11%) and ST-464CC (n=7; 8%) the most abundant. Several  
223 other poultry-associated clonal complexes, which are common in human disease (Berthenet et al.,  
224 2019; Sheppard et al., 2009), including ST-353 (n=3, 3.2%), ST-354 (n=4, 4.3%) and ST-257  
225 (n=4, 4.3%) were identified. Other globally disseminated lineages were found less often in Egypt  
226 (n<=2) i.e., ST460 (n=2), ST1034 (n=2), ST42 (n=1), ST-45 CC (n=1), ST573  
227 (n=1), ST574 (n=1) and ST658 (n=1) (Colles et al., 2010; Olkkola et al., 2016).

228

229 ***Local sequence types***

230 Comparison with a collection representing the known genetic diversity of *C. jejuni* and *C. coli*  
231 identified some common STs (>1,000 profiles in pubMLST) that were completely absent in our  
232 Egyptian collection, i.e., ST-53, ST-829 (*C. coli*), ST-22, ST-61, ST-51, ST-1068 (*C. jejuni*) (**Figure**  
233 **1CD**). Two isolates belonging to ST-1287CC, a genotype that has previously been isolated from  
234 poultry and the environment (Magnússon et al., 2011), was observed exclusively among our Egyptian  
235 isolates, yet absent in UK and genetic context datasets. Furthermore, there were also some STs  
236 belonging to ST-21CC that were found in Egyptian isolate collection (n=>3) that are rare in global  
237 collections (<100 profiles in pubMLST), i.e., ST-1519 (n=4), ST-3769 (n=3). It was also observed  
238 that more *C. coli* was found among Egyptian clinical isolates than is typically observed, specifically  
239 the *C. coli* lineage ST-828 CC 90.4% *C. coli* isolates (19/21) belonged to the ST-828 CC within the  
240 Egyptian dataset and two *C. coli* isolates with unassigned CC of sequence types, ST-7951 and ST-  
241 1681. Three rare STs belonging to ST-828 CC were exclusively found in Egypt dataset which are ST-  
242 1058 (n=1), ST-1059 (n=1), and ST-7950 (n=1).

243

244 ***Increased sharing of accessory genes contributes to a local gene pool***

245 Our Egyptian dataset was compared directly with a previously published study of a single city, ~1-  
246 year survey from Oxford in the UK (Cody et al., 2012). Both populations were similarly diverse,  
247 specifically there were 50 STs (16 CCs) among the Egyptian isolate collection, with a Simpson's  
248 diversity index of 0.817, compared to 205 STs (32 CCs) among the Oxford collection of genomes  
249 (Simpson's diversity index = 0.895; **Figure 1CD**). We used PIRATE to construct a pan-genome of all  
250 Egyptian and Oxford isolates (n=986). Consistent with other studies, we identified an open  
251 pangenome, meaning that the number of genes in the pangenome continues to increase with each  
252 additionally sequenced isolate. Accessory genes represented nearly three-quarters of the pangenome  
253 (3,410 genes; 74% of pangenome) with a quarter of the genes identified (1,225, 26%) considered core  
254 genes present in 95% or more of the isolates. Pairwise comparison of the core nucleotide sequence  
255 (%ANI) and accessory genome sharing of all isolates reflected the clonal frame, with clusters of  
256 closely related isolates sharing a large percentage of ANI (**Figure 2AB**). Direct comparison between

257 the Oxford and Cairo datasets suggested an increase in within-country, local accessory gene sharing  
258 (**Figure 2CD**). The structured clustering of pairwise comparisons of shared accessory genes  
259 suggested that this may vary between lineages and visualization of the differences in the distribution  
260 of pairwise genomic distances with PopPUNK also pointed towards lineage-specific shared gene  
261 pools (**Figure 2E**). Host generalist clonal complex isolates clustered closer together than the more  
262 isolated host-specific isolates. This included the two most common clonal complexes identified in our  
263 Cairo collection, ST-21CC and ST-828CC, which were investigated further (**Figure 2F**).

264

### 265 *Locally diverged sequence types within the globally disseminated ST-21 clonal complexes*

266 As one might expect of within lineage (clonal complex) comparisons, all ST-21CC isolates shared  
267 more than 99% core genome nucleotide identity and shared more accessory genes than the population  
268 average (852 genes; **Figure 2CF**) and significantly more genes were shared between isolates from the  
269 same country (*t*-test with Welch correction;  $p < 0.0001$ ). A maximum-likelihood phylogeny of all  
270 CC21 isolates ( $n=251$ ), the most common clonal complex identified in our collection from Cairo,  
271 identified geography-specific clusters of isolates (**Figure 3A**). These clones also clustered together  
272 when visualizing the distribution of pairwise genomic distances with PopPUNK (**Figure 3B**). While  
273 some specific STs were common in both Oxford and Cairo (ST21 and ST50), others were much more  
274 common in one specific location, e.g., ST-53 in Oxford, and ST-1519 and ST-3769 in Cairo (**Figure**  
275 **3C**). There was also evidence that some lineages had enhanced AMR (**Figure 3D**). While the ST-50  
276 genotype is very common and has been reported more than 3,900 times in pubMLST from 40  
277 countries, this among the first reports from Africa. In both Oxford and Cairo datasets, ST-50 was  
278 often predicted to be MDR. ST-21 is also very common, with more than 4,000 reports from 33  
279 countries in pubMLST but was much less likely to be MDR. Four isolates of the Cairo specific ST-  
280 3769 also represented a high proportion of MDR (**Figure 3E**).

281

### 282 *Extensive multi-drug resistance in local C. coli sequence types*

283 Greater admixture was noted between UK and Egyptian ST-828CC isolates than for ST-21CC – no  
284 geographic clustering was observed in either the core or accessory genomes (**Figure 4AB**). However,

285 only ST-827 was common in both datasets (**Figure 4C**). Several STs were found in the Oxford  
286 dataset that were not identified in Cairo, including the frequently isolated STs -829, -828, -855, 962, -  
287 1145 and -5734. Several lineages were highly resistant to lincosamides, with more than half the  
288 isolates from ST-828, ST-830 and ST-872 predicted to be resistant (**Figure 4D**). All isolates from  
289 ST828 and ST-872 were also predicted to be resistant to chloramphenicol. Overall, *C. coli* isolates (6  
290 of 105, 5.7%) were far more likely to be considered MDR than *C. jejuni* isolates (6 of 876, 0.68%)  
291 and ST-828 complex isolates from Cairo (2 of 19, 10.5%) demonstrated much higher rates of MDR  
292 than in Oxford (3 of 77, 3.8%; **Figure 4E**).

293

#### 294 *Antimicrobial resistance genes are distributed across isolates*

295 In characterization of the resistome, each isolate genome was screened for the presence of genes  
296 associated with AMR. In Egypt, for *C. jejuni*, the average number of AMR genes per isolate was 6.66,  
297 comparable to 6.52 for *C. coli*. In Egypt, the presence of the *tet(O)* gene, conferring tetracycline  
298 resistance, was higher in *C. coli* than *C. jejuni* (76% and 43% respectively). This pattern contrasts  
299 with Oxford where 41.7% of *C. jejuni* but only 35.3% of *C. coli* isolates were found to harbor *tet(O)*.  
300 Whilst a low proportion of Egyptian isolates (6.7%) contained the *blaOXA-61* gene, associated with  
301  $\beta$ -lactam resistance, alternative alleles including *blaOXA-450* and *blaOXA-605* were abundant. In  
302 respect to lineage association with genes, in Egypt the ST-21 clonal complex had a high prevalence of  
303 genes associated with  $\beta$ -lactam resistance (particularly the *blaOXA-193*, *blaOXA-450* and *blaOXA-*  
304 *605* alleles). The *blaOXA-465* allele was closely related to ST-1034. Furthermore, *blaOXA-61* was  
305 closely associated with ST-48 (**Figure 3D**). All of these patterns were reflected amongst the Oxford  
306 isolates. However, numerous genes (including *aadE*, *Ant6-la* and *blaOXA-451*) were found amongst  
307 distant lineages. The multi-drug efflux pump encoded by a three-gene operon (*cmeABC*) was  
308 abundant amongst isolates (n=87,74%) – although an absence of the repressor gene *cmeR* in *C. coli*  
309 was observed.

310

311 Whilst the average number of resistance genes per isolate was comparable for *C. jejuni* in Egypt, this  
312 analysis indicated that *C. coli* held a greater breadth of genes across classes of antimicrobials. Hence,

313 the proportion of MDR isolates, considered when an isolate is resistant to at least three classes, was  
314 28% for *C. coli* compared to 1% for *C. jejuni* (EFSA, 2021). The majority (88%) of MDR isolates in  
315 Egypt were *C. coli*, despite *C. coli* representing about a fifth of the dataset. In other words, a greater  
316 proportion of *C. coli* isolates were MDR. In Oxford, half of MDR isolates were *C. coli*, whilst in this  
317 case representing less than one tenth of the dataset. The *C. jejuni* isolates that were MDR, were all  
318 host generalists – ST-21, ST-48 or ST-206. Amongst Egyptian isolates, genes including *aad9*, *aadE*,  
319 *aadE-Cc*, *ant(6)-Ia*, *aph(2'')-If*, *aph(3')-III* and *aph(3')-IIIa* associated with aminoglycoside resistance,  
320 were almost exclusively associated with *C. coli*, particularly MDR *C. coli*. This association was not as  
321 strong in Oxford. Regarding specific genes and host associations, aminoglycoside resistance-  
322 associated genes were infrequent amongst isolates from chicken or dairy products. *ant(6)-Ia* for  
323 example, was solely found in human samples. In turn, few isolates from chicken and dairy products  
324 were MDR (only 12.5% of MDR isolates was from chicken).  
325

## 326 Discussion

327 Diarrheal disease is a major threat to human health and the second leading cause of death in children  
328 under five years' old LMICs (Lanata et al., 2013). Campylobacteriosis is a major cause of diarrheal  
329 disease worldwide (Amour et al., 2016; ElGendy et al., 2018; Lee et al., 2013) but, despite the  
330 potential importance, little is known about *Campylobacter* in countries where it potentially poses the  
331 greatest health risk. As studies begin to take a worldview of *Campylobacter* epidemiology and  
332 transmission (Mottet and Tempio, 2017), we describe globally disseminated agriculture-associated  
333 disease-causing lineages based on core and accessory genome content, with evidence that local  
334 accessory genome sharing driving acquisition of AMR genes in specific lineages.

335

336 The Egyptian *Campylobacter* isolates included a diverse set of STs, including common disease-  
337 causing lineages and regional STs, that have rarely been reported from other parts of the world.  
338 Industrialized agriculture globalization has dispersed livestock worldwide (Mottet and Tempio, 2017),  
339 expanding the geographical range of *C. jejuni*. This is evident in the Egyptian collection as two of the  
340 most predominant genotypes belonged to the ST-21 and ST-206 clonal complexes (Figure 1D). These  
341 two host generalist clonal complexes have been extensively reported worldwide and frequently  
342 isolated from various reservoir hosts, including human clinical samples (Berthenet et al., 2019; Dingle  
343 et al., 2001; Grove-White et al., 2011; Mossong et al., 2016; Sheppard et al., 2009; Suerbaum et al.,  
344 2001). The ST21-CC exhibits considerable genome plasticity with a clear association with several  
345 virulence genes and resistance to various antimicrobial agents (Aksomaitiene et al., 2019; Gripp et al.,  
346 2011; Habib et al., 2010; Wiczorek et al., 2017; T. Zhang et al., 2016). Poultry-associated clonal  
347 complexes, ST-206, ST-464, ST-48, ST-257 and ST-354 were also common among the Egyptian  
348 isolates, all of which are among the most prevalent clonal complexes isolated in Europe (Colles et al.,  
349 2011; Elhadidy et al., 2018; Fiedoruk et al., 2019).

350

351 Further comparison of isolate genotypes collected in Cairo with a large global collection revealed the  
352 absence of certain lineages, most notably the lack of the cattle-associated genotype, ST-61 (Dingle et

353 al., 2002; Mourkas et al., 2020). There was only one isolate, of dairy product origin, that could be  
354 attributed to a cattle-specialist clonal complex (ST-42), which is unexpected as several (n=24) isolates  
355 were sampled from dairy products. *Campylobacter* isolates from cattle have predominantly been  
356 sampled from meat, milk products and fecal sources (n=2,726 in pubMLST; Kwan et al., 2008;  
357 Mourkas et al., 2020; Epping et al., 2021). Suggesting that dairy products isolates might represent a  
358 different source population in Egypt.

359

360 There were also no isolates belonging to the ST-22 CC, a particularly high risk lineage which is  
361 commonly found among patients with post-infectious complications of campylobacteriosis, such as  
362 GBS and IBS (Revez et al., 2011; Peters et al., 2021). Although one isolate in our collection was from  
363 ST-45 CC, this host generalist clonal complex is often one of the most commonly isolates lineages in  
364 clinical surveillance studies worldwide (De Haan et al., 2010; Sheppard et al., 2009; Shin et al., 2013;  
365 Sopwith et al., 2008). Notably however, it is often absent (or under-represented) in studies conducted  
366 in LMICs (Pascoe et al., 2020; Sarhangi et al., 2021). This is consistent with observations from other  
367 LMICs, where local differences in disease epidemiology are reflected by the absence of common  
368 *Campylobacter* lineages, and the presence of rare or unique sequence types (Graham et al., 2016;  
369 Pascoe et al., 2020; Prachantasena et al., 2016; P. Zhang et al., 2020). Among our Egyptian isolates  
370 the ST-1287 clonal complex (n=2) has been reported less than 4 times from other parts of the world  
371 (Colles et al., 2011; de Haan et al., 2010; Ramonaite et al., 2014; P. Zhang et al., 2020).

372

373 Geographical differences have been noted in ST-21CC (Kärenlampi et al., 2007; Kovanen et al.,  
374 2014; Olkkola et al., 2016; Pascoe et al., 2017; Wallace et al., 2021). ST-21 CC isolates are among  
375 the most common *C. jejuni* genotypes isolated worldwide, with one quarter of *C. jejuni* isolates  
376 recorded in the pubMLST database are ST21 CC. Isolates of the ST-50 sequence type (n= 3,915)  
377 alone have been sampled from 6 continents and 44 countries, although this will be their first report  
378 from Africa (Jolley et al., 2018). Our Egyptian ST-50 isolates do cluster together on a ML phylogeny  
379 of ST-21 CC isolates and away from the Oxford ST-21 CC when grouped by PopPunk. Two sequence  
380 types were unique to Egypt, ST-1519 and ST-3769, with nearly 10% of the ST-3769 isolates were



381 MDR. A slightly greater proportion of the Egyptian ST-50 isolates were also MDR, although this  
382 sequence type has been observed to be MDR in other parts of the world (Elhadidy et al., 2020).

383

384 The *C. coli* ST-828 clonal complex did not show as much geographical segregation, and when  
385 grouping our Egyptian isolates by core and accessory genome distances they clustered with the UK  
386 isolates, despite several STs being isolated in only one of the datasets. STs found in the Egyptian  
387 dataset were more often MDR than UK isolates, and overall *C. coli* from Cairo were far more MDR  
388 than *C. coli* isolates from developed countries (Du et al., 2018; Gharbi et al., 2018; Mourkas et al.,  
389 2019). The most compelling clarification for such abundance could be that *C. coli* of ST-828 CC have  
390 a great recombination potential besides the accumulation of *C. jejuni* DNA throughout the genome of  
391 this lineage which could have led to the acquisition of multiple AMR genes (Sheppard et al., 2008,  
392 2013).

393

394 Overall, there is a clear evidence of local sharing and recent acquisition of accessory gene content of  
395 AMR genes within the Egyptian isolates. Specifically, pairwise clustering of isolates by core and  
396 accessory genome distances recapitulated clusters according to ST and clonal complex (**Figure 2**),  
397 however most Egyptian isolates were more tightly clustered than the Oxford dataset, consistent with  
398 shared acquisition of accessory genes. Overall, ANI and shared accessory genes were similar between  
399 Oxford and Egyptian isolates (per isolate), however the two most common clonal complexes found in  
400 our Cairo dataset demonstrated greater sharing of accessory genes, indicative of a shared gene pool.  
401 Our study suggested that while geographical partitioning doesn't impact the composition of the core  
402 genome, represented by the shared STs and CCs, the accessory genome is influenced. Within the  
403 Egyptian isolates, the most prevalent *C. jejuni* genotypes (ST-21CC and ST-206CC) showed clear  
404 evidence of transmission of MDR determinants among lineages. Multiple factors could influence this,  
405 such as livestock and food production practices and the segregation of MDR isoaltes. However,  
406 selective pressure for MDR is clearly attributable to antibiotic usage and potentially zoonotic  
407 transmissions as well as the rate of horizontal gene transfer (Fiedoruk et al., 2019). Our study  
408 provides evidence to support programs aimed at improved antibiotic stewardship in clinical and

409 veterinary settings. With strict control measures, and an understanding of transmission of strains from  
410 animal reservoirs through the food production chain, it may be possible to reduce contamination with  
411 MDR *Campylobacter* in Egypt.  
412

413 **Author statements**

414 **Author contributions**

415 SM, JKC, BP, ME and SKS designed the study and wrote the paper.

416 JKC, BP, EM, GF, CL, HW performed genomic analysis.

417 BP, CL and MDH sequenced and assembled genomes.

418 All authors contributed and approved the final manuscript.

419

420 **Conflict of interest**

421 All authors declare no conflict of interest.

422

423 **Funding information**

424 This study was partially funded by Zewail City internal research grant fund (ZC 004-2019) and joint

425 ASRT/BA research grant (Project number 1110) awarded to ME. We would like to thank the

426 British Academy of Medical Sciences for funding the research stay of ME at the Milner Centre of

427 Evolution, University of Bath through the Daniel Turnberg Travel Fellowship. Research and

428 computation were supported by the Medical Research Council (MR/L015080/1), the Wellcome Trust

429 (088786/C/09/Z) and the Biotechnology and Biological Sciences Research Council (BB/I02464X/1

430 and BB/R003491/1).

431

432 **Ethical approval**

433 The study represents a retrospective study that involved sequencing the genomes of a historical strain

434 collection and no patient data collection was involved in this study. Ethical approval was granted from

435 the respective ethics committee in the Egyptian central directorate of research and health development

436 before conducting the study.

437

438 **Acknowledgements**

439

## 440 References

- 441 Abd El-Tawab, A. A., Ammar, A. M., Ahmed, H. A., El Hofy, F. I., and Hefny, A. A. (2018). Fluoroquinolone  
442 resistance and *gyrA* mutations in *Campylobacter jejuni* and *Campylobacter coli* isolated from chicken  
443 in Egypt. *Journal of Global Antimicrobial Resistance*, 13, 22–23.  
444 <https://doi.org/10.1016/j.jgar.2018.02.019>
- 445 Abdi Hachesoo, B., Khoshbakht, R., Sharifi Yazdi, H., Tabatabaei, M., Hosseinzadeh, S., and Asasi, K. (2014).  
446 Tetracycline Resistance Genes in *Campylobacter jejuni* and *C. coli* Isolated From Poultry Carcasses.  
447 *Jundishapur Journal of Microbiology*, 7(8). <https://doi.org/10.5812/jjm.12129>
- 448 Achtman, M. (2008). Evolution, population structure, and phylogeography of genetically monomorphic  
449 bacterial pathogens. *Annual Review of Microbiology*, 62, 53–70.  
450 <https://doi.org/10.1146/annurev.micro.62.081307.162832>
- 451 Aksomaitiene, J., Ramonaite, S., Tamuleviciene, E., Novoslavskij, A., Alter, T., and Malakauskas, M. (2019).  
452 Overlap of Antibiotic Resistant *Campylobacter jejuni* MLST Genotypes Isolated From Humans,  
453 Broiler Products, Dairy Cattle and Wild Birds in Lithuania. *Frontiers in Microbiology*, 10.  
454 <https://doi.org/10.3389/fmicb.2019.01377>
- 455 Amour, C., Gratz, J., Mduma, E., Svensen, E., Rogawski, E. T., McGrath, M., Seidman, J. C., McCormick, B. J.  
456 J., Shrestha, S., Samie, A., Mahfuz, M., Qureshi, S., Hotwani, A., Babji, S., Trigo, D. R., Lima, A.  
457 A. M., Bodhidatta, L., Bessong, P., Ahmed, T., ... Etiology, Risk Factors, and Interactions of Enteric  
458 Infections and Malnutrition and the Consequences for Child Health and Development Project (MAL-  
459 ED) Network Investigators. (2016). Epidemiology and Impact of *Campylobacter* Infection in Children  
460 in 8 Low-Resource Settings: Results From the MAL-ED Study. *Clinical Infectious Diseases: An*  
461 *Official Publication of the Infectious Diseases Society of America*, 63(9), 1171–1179.  
462 <https://doi.org/10.1093/cid/ciw542>
- 463 Argimón, S., Abudahab, K., Goater, R. J. E., Fedosejev, A., Bhai, J., Glasner, C., Feil, E. J., Holden, M. T. G.,  
464 Yeats, C. A., Grundmann, H., Spratt, B. G., and Aanensen, D. M. (2016). Microreact: Visualizing and  
465 sharing data for genomic epidemiology and phylogeography. *Microbial Genomics*, 2(11), e000093.  
466 <https://doi.org/10.1099/mgen.0.000093>
- 467 Asakura, H., Brüggemann, H., Sheppard, S. K., Ekawa, T., Meyer, T. F., Yamamoto, S., and Igimi, S. (2012).  
468 Molecular evidence for the thriving of *Campylobacter jejuni* ST-4526 in Japan. *PloS One*, 7(11),  
469 e48394. <https://doi.org/10.1371/journal.pone.0048394>

- 470 Asuming-Bediako, N., Parry-Hanson Kunadu, A., Abraham, S., and Habib, I. (2019). Campylobacter at the  
471 Human–Food Interface: The African Perspective. *Pathogens*, 8(2), 87.  
472 <https://doi.org/10.3390/pathogens8020087>
- 473 Bankevich, A., Nurk, S., Antipov, D., Gurevich, A. A., Dvorkin, M., Kulikov, A. S., Lesin, V. M., Nikolenko,  
474 S. I., Pham, S., Prjibelski, A. D., Pyshkin, A. V., Sirotkin, A. V., Vyahhi, N., Tesler, G., Alekseyev, M.  
475 A., and Pevzner, P. A. (2012). SPAdes: A New Genome Assembly Algorithm and Its Applications to  
476 Single-Cell Sequencing. *Journal of Computational Biology*, 19(5), 455–477.  
477 <https://doi.org/10.1089/cmb.2012.0021>
- 478 Bayliss, S. C., Thorpe, H. A., Coyle, N. M., Sheppard, S. K., and Feil, E. J. (2019). PIRATE: A fast and scalable  
479 pangenomics toolbox for clustering diverged orthologues in bacteria. *GigaScience*, 8(10).  
480 <https://doi.org/10.1093/gigascience/giz119>
- 481 Berthenet, E., Thépault, A., Chemaly, M., Rivoal, K., Ducournau, A., Buissonnière, A., Bénéjat, L., Bessède,  
482 E., Mégraud, F., Sheppard, S. K., and Lehours, P. (2019). Source attribution of *Campylobacter jejuni*  
483 shows variable importance of chicken and ruminants reservoirs in non-invasive and invasive French  
484 clinical isolates. *Scientific Reports*, 9(1), 8098. <https://doi.org/10.1038/s41598-019-44454-2>
- 485 Calland, J. K., Pascoe, B., Bayliss, S. C., Mourkas, E., Berthenet, E., Thorpe, H. A., Hitchings, M. D., Feil, E.  
486 J., Blaser, M. J., Falush, D., and Sheppard, S. K. (2020). Quantifying bacterial evolution in the wild: A  
487 birthday problem for *Campylobacter* lineages. *BioRxiv*, 2020.12.02.407999.  
488 <https://doi.org/10.1101/2020.12.02.407999>
- 489 CDC. (2020, March 13). *Antibiotic-resistant Germs: New Threats*. Centers for Disease Control and Prevention.  
490 <https://www.cdc.gov/drugresistance/biggest-threats.html>
- 491 Chen, L., Yang, J., Yu, J., Yao, Z., Sun, L., Shen, Y., and Jin, Q. (2005). VFDB: A reference database for  
492 bacterial virulence factors. *Nucleic Acids Research*, 33(suppl\_1), D325–D328.  
493 <https://doi.org/10.1093/nar/gki008>
- 494 Cody, A. J., McCarthy, N. M., Wimalaratna, H. L., Colles, F. M., Clark, L., Bowler, I. C. J. W., Maiden, M. C.  
495 J., and Dingle, K. E. (2012). A Longitudinal 6-Year Study of the Molecular Epidemiology of Clinical  
496 *Campylobacter* Isolates in Oxfordshire, United Kingdom. *Journal of Clinical Microbiology*, 50(10),  
497 3193–3201. <https://doi.org/10.1128/JCM.01086-12>
- 498 Coker, A. O. (2002). Human *Campylobacteriosis* in Developing Countries. *Emerging Infectious Diseases*, 8(3),  
499 237–243. <https://doi.org/10.3201/eid0803.010233>

- 500 Colles, F. M., Ali, J. S., Sheppard, S. K., McCarthy, N. D., and Maiden, M. C. J. (2011). *Campylobacter*  
501 populations in wild and domesticated Mallard ducks (*Anas platyrhynchos*): *Campylobacter* in ducks.  
502 *Environmental Microbiology Reports*, 3(5), 574–580. <https://doi.org/10.1111/j.1758->  
503 2229.2011.00265.x
- 504 Colles, F. M., and Maiden, M. C. J. (2012). *Campylobacter* sequence typing databases: Applications and future  
505 prospects. *Microbiology*, 158(11), 2695–2709. <https://doi.org/10.1099/mic.0.062000-0>
- 506 Colles, F. M., McCarthy, N. D., Sheppard, S. K., Layton, R., and Maiden, M. C. J. (2010). Comparison of  
507 *Campylobacter* populations isolated from a free-range broiler flock before and after slaughter.  
508 *International Journal of Food Microbiology*, 137(2–3), 259–264.  
509 <https://doi.org/10.1016/j.ijfoodmicro.2009.12.021>
- 510 Comas, I., Coscolla, M., Luo, T., Borrell, S., Holt, K. E., Kato-Maeda, M., Parkhill, J., Malla, B., Berg, S.,  
511 Thwaites, G., Yeboah-Manu, D., Bothamley, G., Mei, J., Wei, L., Bentley, S., Harris, S. R., Niemann,  
512 S., Diel, R., Aseffa, A., ... Gagneux, S. (2013). Out-of-Africa migration and Neolithic coexpansion of  
513 *Mycobacterium tuberculosis* with modern humans. *Nature Genetics*, 45(10), 1176–1182.  
514 <https://doi.org/10.1038/ng.2744>
- 515 Crofts, A. A., Poly, F. M., Ewing, C. P., Kuroiwa, J. M., Rimmer, J. E., Harro, C., Sack, D., Talaat, K. R.,  
516 Porter, C. K., Gutierrez, R. L., DeNearing, B., Brubaker, J., Laird, R. M., Maue, A. C., Jaep, K.,  
517 Alcala, A., Tribble, D. R., Riddle, Mark. S., Ramakrishnan, A., ... Trent, M. S. (2018). *Campylobacter*  
518 *jejuni* transcriptional and genetic adaptation during human infection. *Nature Microbiology*, 3(4), 494–  
519 502. <https://doi.org/10.1038/s41564-018-0133-7>
- 520 Dahshan, H., Abd-Elall, A. M. M., Megahed, A. M., Abd-El-Kader, M. A., and Nabawy, E. E. (2015).  
521 Veterinary antibiotic resistance, residues, and ecological risks in environmental samples obtained from  
522 poultry farms, Egypt. *Environmental Monitoring and Assessment*, 187(2), 2.  
523 <https://doi.org/10.1007/s10661-014-4218-3>
- 524 De Haan, C. P. A., Kivistö, R., Hakkinen, M., Rautelin, H., and Hänninen, M. L. (2010). Decreasing trend of  
525 overlapping multilocus sequence types between human and chicken *Campylobacter jejuni* isolates over  
526 a decade in finland. *Applied and Environmental Microbiology*. <https://doi.org/10.1128/AEM.00581-10>
- 527 Dearlove, B. L., Cody, A. J., Pascoe, B., Méric, G., Wilson, D. J., and Sheppard, S. K. (2016). Rapid host  
528 switching in generalist *Campylobacter* strains erodes the signal for tracing human infections. *The ISME*  
529 *Journal*, 10(3), 721–729. <https://doi.org/10.1038/ismej.2015.149>

- 530 Dingle, K. E., Colles, F. M., Ure, R., Wagenaar, J. A., Duim, B., Bolton, F. J., Fox, A. J., Wareing, D. R. A.,  
531 and Maiden, M. C. J. (2002). Molecular Characterization of *Campylobacter jejuni* Clones: A Basis for  
532 Epidemiologic Investigation. *Emerging Infectious Diseases*, 8(9), 949–955.  
533 <https://doi.org/10.3201/eid0809.020122>
- 534 Dingle, K. E., Colles, F. M., Wareing, D. R. A., Ure, R., Fox, A. J., Bolton, F. E., Bootsma, H. J., Willems, R. J.  
535 L., Urwin, R., and Maiden, M. C. J. (2001). Multilocus Sequence Typing System for *Campylobacter*  
536 *jejuni*. *Journal of Clinical Microbiology*, 39(1), 14–23. <https://doi.org/10.1128/JCM.39.1.14-23.2001>
- 537 Du, Y., Wang, C., Ye, Y., Liu, Y., Wang, A., Li, Y., Zhou, X., Pan, H., Zhang, J., and Xu, X. (2018). Molecular  
538 Identification of Multidrug-Resistant *Campylobacter* Species From Diarrheal Patients and Poultry Meat  
539 in Shanghai, China. *Frontiers in Microbiology*, 9. <https://doi.org/10.3389/fmicb.2018.01642>
- 540 ElGendy, A., Sainato, R., Kuroiwa, J., Poly, F., Riddle, M. S., Guerry, P., and Porter, C. K. (2018).  
541 Epidemiology of *Campylobacter* Infections among Children in Egypt. *The American Journal of*  
542 *Tropical Medicine and Hygiene*, 98(2), 581–585. <https://doi.org/10.4269/ajtmh.17-0469>
- 543 Elhadidy, M., Ali, M. M., El-Shibiny, A., Miller, W. G., Elkhatib, W. F., Botteldoorn, N., and Dierick, K.  
544 (2020). Antimicrobial resistance patterns and molecular resistance markers of *Campylobacter jejuni*  
545 isolates from human diarrheal cases. *PLOS ONE*, 15(1), e0227833.  
546 <https://doi.org/10.1371/journal.pone.0227833>
- 547 Elhadidy, M., Miller, W. G., Arguello, H., Álvarez-Ordóñez, A., Duarte, A., Dierick, K., and Botteldoorn, N.  
548 (2018). Genetic Basis and Clonal Population Structure of Antibiotic Resistance in *Campylobacter*  
549 *jejuni* Isolated From Broiler Carcasses in Belgium. *Frontiers in Microbiology*, 9, 1014.  
550 <https://doi.org/10.3389/fmicb.2018.01014>
- 551 Epping, L., Walther, B., Piro, R. M., Knüver, M.-T., Huber, C., Thürmer, A., Flieger, A., Fruth, A., Janecko, N.,  
552 Wieler, L. H., Stingl, K., and Semmler, T. (2021). Genome-wide insights into population structure and  
553 host specificity of *Campylobacter jejuni*. *Scientific Reports*, 11(1), 10358.  
554 <https://doi.org/10.1038/s41598-021-89683-6>
- 555 Facciola, A., Riso, R., Avventuroso, E., Visalli, G., Delia, S. A., and Laganà, P. (2017). CAMPYLOBACTER:  
556 FROM MICROBIOLOGY TO PREVENTION. *Journal of Preventive Medicine and Hygiene*, Vol 58,  
557 E79-92 Pages. <https://doi.org/10.15167/2421-4248/JPMH2017.58.2.672>
- 558 Falush, D., Wirth, T., Linz, B., Pritchard, J. K., Stephens, M., Kidd, M., Blaser, M. J., Graham, D. Y., Vacher,  
559 S., Perez-Perez, G. I., Yamaoka, Y., Mégraud, F., Otto, K., Reichard, U., Katzowitsch, E., Wang, X.,

- 560           Achtman, M., and Suerbaum, S. (2003). Traces of human migrations in *Helicobacter pylori*  
561           populations. *Science (New York, N.Y.)*, 299(5612), 1582–1585.  
562           <https://doi.org/10.1126/science.1080857>
- 563           Fiedoruk, K., Daniluk, T., Rozkiewicz, D., Oldak, E., Prasad, S., and Swiecicka, I. (2019). Whole-genome  
564           comparative analysis of *Campylobacter jejuni* strains isolated from patients with diarrhea in  
565           northeastern Poland. *Gut Pathogens*, 11. <https://doi.org/10.1186/s13099-019-0313-x>
- 566           French, N., Barrigas, M., Brown, P., Ribiero, P., Williams, N., Leatherbarrow, H., Birtles, R., Bolton, E.,  
567           Fearnhead, P., and Fox, A. (2005). Spatial epidemiology and natural population structure of  
568           *Campylobacter jejuni* colonizing a farmland ecosystem. *Environmental Microbiology*, 7(8), 1116–  
569           1126. <https://doi.org/10.1111/j.1462-2920.2005.00782.x>
- 570           Gagneux, S., and Small, P. M. (2007). Global phylogeography of *Mycobacterium tuberculosis* and implications  
571           for tuberculosis product development. *The Lancet. Infectious Diseases*, 7(5), 328–337.  
572           [https://doi.org/10.1016/S1473-3099\(07\)70108-1](https://doi.org/10.1016/S1473-3099(07)70108-1)
- 573           Gharbi, M., BÉjaoui, A., Ben Hamda, C., Jouini, A., Ghedira, K., Zrelli, C., Hamrouni, S., Aouadhi, C.,  
574           Bessoussa, G., Ghram, A., and Maaroufi, A. (2018). Prevalence and Antibiotic Resistance Patterns of  
575           *Campylobacter* spp. Isolated from Broiler Chickens in the North of Tunisia. *BioMed Research*  
576           *International*, 2018, 1–7. <https://doi.org/10.1155/2018/7943786>
- 577           Gillespie, I. A., O'Brien, S. J., Frost, J. A., Adak, G. K., Horby, P., Swan, A. V., Painter, M. J., Neal, K. R., and  
578           the *Campylobacter* Sentinel Surveillance System Collaborators. (2002). A Case-Case Comparison of  
579           *Campylobacter coli* and *Campylobacter jejuni* Infection: A Tool for Generating Hypotheses. *Emerging*  
580           *Infectious Diseases*, 8(9), 937–942. <https://doi.org/10.3201/eid0809.010817>
- 581           Graham, J. P., Vasco, K., and Trueba, G. (2016). Hyperendemic *Campylobacter jejuni* in guinea pigs (*Cavia*  
582           *porcellus*) raised for food in a semi-rural community of Quito, Ecuador: *Campylobacter jejuni* in  
583           guinea pigs. *Environmental Microbiology Reports*, 8(3), 382–387. [https://doi.org/10.1111/1758-](https://doi.org/10.1111/1758-2229.12396)  
584           2229.12396
- 585           Griekspoor, P., Colles, F. M., McCarthy, N. D., Hansbro, P. M., Ashhurst-Smith, C., Olsen, B., Hasselquist,  
586           D., Maiden, M. C. J., and Waldenström, J. (2013). Marked host specificity and lack of  
587           phylogeographic population structure of *Campylobacter jejuni* in wild birds. *Molecular Ecology*, 22(5),  
588           1463–1472. <https://doi.org/10.1111/mec.12144>



- 589 Gripp, E., Hlahla, D., Didelot, X., Kops, F., Maurischat, S., Tedin, K., Alter, T., Ellerbroek, L., Schreiber, K.,  
590 Schomburg, D., Janssen, T., Bartholomäus, P., Hofreuter, D., Woltemate, S., Uhr, M., Brenneke, B.,  
591 Grüning, P., Gerlach, G., Wieler, L., ... Josenhans, C. (2011). Closely related *Campylobacter jejuni*  
592 strains from different sources reveal a generalist rather than a specialist lifestyle. *BMC Genomics*.  
593 <https://doi.org/10.1186/1471-2164-12-584>
- 594 Grove-White, D. H., Leatherbarrow, A. J. H., Cripps, P. J., Diggle, P. J., and French, N. P. (2011). Molecular  
595 epidemiology and genetic diversity of *Campylobacter jejuni* in ruminants. *Epidemiology and Infection*.  
596 <https://doi.org/10.1017/S0950268810002736>
- 597 Grundmann, H., Hori, S., and Tanner, G. (2001). Determining Confidence Intervals When Measuring Genetic  
598 Diversity and the Discriminatory Abilities of Typing Methods for Microorganisms. *Journal of Clinical*  
599 *Microbiology*, 39(11), 4190–4192. <https://doi.org/10.1128/JCM.39.11.4190-4192.2001>
- 600 Gundogdu, O., Bentley, S. D., Holden, M. T., Parkhill, J., Dorrell, N., and Wren, B. W. (2007). Re-annotation  
601 and re-analysis of the *Campylobacter jejuni* NCTC11168 genome sequence. *BMC Genomics*, 8(1), 162.  
602 <https://doi.org/10.1186/1471-2164-8-162>
- 603 Gürtler, M., Alter, T., Kasimir, S., and Fehlhaber, K. (2005). The importance of *Campylobacter coli* in human  
604 campylobacteriosis: Prevalence and genetic characterization. *Epidemiology and Infection*, 133(6),  
605 1081–1087. <https://doi.org/10.1017/S0950268805004164>
- 606 Habib, I., Uyttendaele, M., and De Zutter, L. (2010). Survival of poultry-derived *Campylobacter jejuni* of  
607 multilocus sequence type clonal complexes 21 and 45 under freeze, chill, oxidative, acid and heat  
608 stresses. *Food Microbiology*, 27(6), 829–834. <https://doi.org/10.1016/j.fm.2010.04.009>
- 609 Hoang, D. T., Chernomor, O., von Haeseler, A., Minh, B. Q., and Vinh, L. S. (2018). UFBoot2: Improving the  
610 Ultrafast Bootstrap Approximation. *Molecular Biology and Evolution*, 35(2), 518–522.  
611 <https://doi.org/10.1093/molbev/msx281>
- 612 Inglis, G. D., Gusse, J. F., House, K. E., Shelton, T. G., and Taboada, E. N. (2019). Tetracycline Resistant  
613 *Campylobacter jejuni* Subtypes Emanating from Beef Cattle Administered Non-Therapeutic  
614 Chlortetracycline are Longitudinally Transmitted within the Production Continuum but are Not  
615 Detected in Ground Beef. *Microorganisms*, 8(1), 23. <https://doi.org/10.3390/microorganisms8010023>
- 616 Islam, Z., van Belkum, A., Wagenaar, J. A., Cody, A. J., de Boer, A. G., Sarker, S. K., Jacobs, B. C., Talukder,  
617 K. A., and Endtz, H. P. (2014). Comparative population structure analysis of *Campylobacter jejuni*  
618 from human and poultry origin in Bangladesh. *European Journal of Clinical Microbiology and*

- 619 *Infectious Diseases: Official Publication of the European Society of Clinical Microbiology*, 33(12),  
620 2173–2181. <https://doi.org/10.1007/s10096-014-2184-x>
- 621 Jain, C., Rodriguez-R, L. M., Phillippy, A. M., Konstantinidis, K. T., and Aluru, S. (2018). High throughput  
622 ANI analysis of 90K prokaryotic genomes reveals clear species boundaries. *Nature Communications*,  
623 9(1), 5114. <https://doi.org/10.1038/s41467-018-07641-9>
- 624 Jolley, K. A., Bray, J. E., and Maiden, M. C. J. (2018). Open-access bacterial population genomics: BIGSdb  
625 software, the PubMLST.org website and their applications. *Wellcome Open Research*, 3, 124.  
626 <https://doi.org/10.12688/wellcomeopenres.14826.1>
- 627 Jolley, K. A., and Maiden, M. C. (2010). BIGSdb: Scalable analysis of bacterial genome variation at the  
628 population level. *BMC Bioinformatics*, 11(1), 595. <https://doi.org/10.1186/1471-2105-11-595>
- 629 Kaakoush, N. O., Castañó-Rodríguez, N., Mitchell, H. M., and Man, S. M. (2015). Global Epidemiology of  
630 *Campylobacter* Infection. *Clinical Microbiology Reviews*, 28(3), 687–720.  
631 <https://doi.org/10.1128/CMR.00006-15>
- 632 Kärenlampi, R., Rautelin, H., Schönberg-Norio, D., Paulin, L., and Hänninen, M.-L. (2007). Longitudinal  
633 Study of Finnish *Campylobacter jejuni* and *C. coli* Isolates from Humans, Using Multilocus Sequence  
634 Typing, Including Comparison with Epidemiological Data and Isolates from Poultry and Cattle.  
635 *Applied and Environmental Microbiology*, 73(1), 148–155. <https://doi.org/10.1128/AEM.01488-06>
- 636 Katoh, K., and Standley, D. M. (2013). MAFFT Multiple Sequence Alignment Software Version 7:  
637 Improvements in Performance and Usability. *Molecular Biology and Evolution*, 30(4), 772–780.  
638 <https://doi.org/10.1093/molbev/mst010>
- 639 Kirk, K. F., Méric, G., Nielsen, H. L., Pascoe, B., Sheppard, S. K., Thorlacius-Ussing, O., and Nielsen, H.  
640 (2018). Molecular epidemiology and comparative genomics of *Campylobacter concisus* strains from  
641 saliva, faeces and gut mucosal biopsies in inflammatory bowel disease. *Scientific Reports*, 8(1), 1902.  
642 <https://doi.org/10.1038/s41598-018-20135-4>
- 643 Kivistö, R. I., Kovanen, S., Skarp-de Haan, A., Schott, T., Rahkio, M., Rossi, M., and Hänninen, M.-L. (2014).  
644 Evolution and comparative genomics of *Campylobacter jejuni* ST-677 clonal complex. *Genome  
645 Biology and Evolution*, 6(9), 2424–2438. <https://doi.org/10.1093/gbe/evu194>
- 646 Kovanen, S. M., Kivistö, R. I., Rossi, M., Schott, T., Kärkkäinen, U.-M., Tuuminen, T., Uksila, J., Rautelin, H.,  
647 and Hänninen, M.-L. (2014). Multilocus sequence typing (MLST) and whole-genome MLST of

- 648           Campylobacter jejuni isolates from human infections in three districts during a seasonal peak in  
649           Finland. *Journal of Clinical Microbiology*, 52(12), 4147–4154. <https://doi.org/10.1128/JCM.01959-14>
- 650   Kwan, P. S. L., Birtles, A., Bolton, F. J., French, N. P., Robinson, S. E., Newbold, L. S., Upton, M., and Fox, A.  
651           J. (2008). Longitudinal Study of the Molecular Epidemiology of Campylobacter jejuni in Cattle on  
652           Dairy Farms. *Applied and Environmental Microbiology*, 74(12), 3626–3633.  
653           <https://doi.org/10.1128/AEM.01669-07>
- 654   Lanata, C. F., Fischer-Walker, C. L., Olascoaga, A. C., Torres, C. X., Aryee, M. J., Black, R. E., and for the  
655           Child Health Epidemiology Reference Group of the World Health Organization and UNICEF. (2013).  
656           Global Causes of Diarrheal Disease Mortality in Children <5 Years of Age: A Systematic Review.  
657           *PLoS ONE*, 8(9), e72788. <https://doi.org/10.1371/journal.pone.0072788>
- 658   Lee, G., Pan, W., Peñataro Yori, P., Paredes Olortegui, M., Tilley, D., Gregory, M., Oberhelman, R., Burga, R.,  
659           Chavez, C. B., and Kosek, M. (2013). Symptomatic and Asymptomatic Campylobacter Infections  
660           Associated with Reduced Growth in Peruvian Children. *PLoS Neglected Tropical Diseases*, 7(1).  
661           <https://doi.org/10.1371/journal.pntd.0002036>
- 662   Lees, J. A., Harris, S. R., Tonkin-Hill, G., Gladstone, R. A., Lo, S. W., Weiser, J. N., Corander, J., Bentley, S.  
663           D., and Croucher, N. J. (2019). Fast and flexible bacterial genomic epidemiology with PopPUNK.  
664           *Genome Research*, 29(2), 304–316. <https://doi.org/10.1101/gr.241455.118>
- 665   Liu, J., Platts-Mills, J. A., Juma, J., Kabir, F., Nkeze, J., Okoi, C., Operario, D. J., Uddin, J., Ahmed, S., Alonso,  
666           P. L., Antonio, M., Becker, S. M., Blackwelder, W. C., Breiman, R. F., Faruque, A. S. G., Fields, B.,  
667           Gratz, J., Haque, R., Hossain, A., ... Houpt, E. R. (2016). Use of quantitative molecular diagnostic  
668           methods to identify causes of diarrhoea in children: A reanalysis of the GEMS case-control study.  
669           *Lancet (London, England)*, 388(10051), 1291–1301. [https://doi.org/10.1016/S0140-6736\(16\)31529-X](https://doi.org/10.1016/S0140-6736(16)31529-X)
- 670   Liu, L., Johnson, H. L., Cousens, S., Perin, J., Scott, S., Lawn, J. E., Rudan, I., Campbell, H., Cibulskis, R., Li,  
671           M., Mathers, C., and Black, R. E. (2012). Global, regional, and national causes of child mortality: An  
672           updated systematic analysis for 2010 with time trends since 2000. *The Lancet*, 379(9832), 2151–2161.  
673           [https://doi.org/10.1016/S0140-6736\(12\)60560-1](https://doi.org/10.1016/S0140-6736(12)60560-1)
- 674   Luangtongkum, T., Jeon, B., Han, J., Plummer, P., Logue, C. M., and Zhang, Q. (2009). Antibiotic resistance in  
675           *Campylobacter*: Emergence, transmission and persistence. *Future Microbiology*, 4(2), 189–200.  
676           <https://doi.org/10.2217/17460913.4.2.189>

- 677 Magnússon, S. H., Guðmundsdóttir, S., Reynisson, E., Rúnarsson, Á. R., Harðardóttir, H., Gunnarson, E.,  
678 Georgsson, F., Reiersen, J., and Marteinson, V. T. (2011). Comparison of *Campylobacter jejuni*  
679 isolates from human, food, veterinary and environmental sources in Iceland using PFGE, MLST and  
680 fla-SVR sequencing. *Journal of Applied Microbiology*, *111*(4), 971–981.  
681 <https://doi.org/10.1111/j.1365-2672.2011.05100.x>
- 682 McCormick, B. J. J., and Lang, D. R. (2016). Diarrheal disease and enteric infections in LMIC communities:  
683 How big is the problem? *Tropical Diseases, Travel Medicine and Vaccines*, *2*(1), 11.  
684 <https://doi.org/10.1186/s40794-016-0028-7>
- 685 Méric, G., McNally, A., Pessia, A., Mourkas, E., Pascoe, B., Mageiros, L., Vehkala, M., Corander, J., and  
686 Sheppard, S. K. (2018). Convergent Amino Acid Signatures in Polyphyletic *Campylobacter jejuni*  
687 Subpopulations Suggest Human Niche Tropism. *Genome Biology and Evolution*, *10*(3), 763–774.  
688 <https://doi.org/10.1093/gbe/evy026>
- 689 Méric, G., Yahara, K., Mageiros, L., Pascoe, B., Maiden, M. C. J., Jolley, K. A., and Sheppard, S. K. (2014). A  
690 Reference Pan-Genome Approach to Comparative Bacterial Genomics: Identification of Novel  
691 Epidemiological Markers in Pathogenic *Campylobacter*. *PLOS ONE*, *9*(3), e92798.  
692 <https://doi.org/10.1371/journal.pone.0092798>
- 693 Mohan, V., Stevenson, M., Marshall, J., Fearnhead, P., Holland, B. R., Hotter, G., and French, N. P. (2013).  
694 *Campylobacter jejuni* colonization and population structure in urban populations of ducks and starlings  
695 in New Zealand. *MicrobiologyOpen*, *2*(4), 659–673. <https://doi.org/10.1002/mbo3.102>
- 696 Moodley, Y., Linz, B., Yamaoka, Y., Windsor, H. M., Breurec, S., Wu, J.-Y., Maady, A., Bernhöft, S.,  
697 Thiberge, J.-M., Phuanukoonnon, S., Jobb, G., Siba, P., Graham, D. Y., Marshall, B. J., and Achtman,  
698 M. (2009). The peopling of the Pacific from a bacterial perspective. *Science (New York, N.Y.)*,  
699 *323*(5913), 527–530. <https://doi.org/10.1126/science.1166083>
- 700 Mossong, J., Mughini-Gras, L., Penny, C., Devaux, A., Olinger, C., Losch, S., Cauchie, H.-M., van Pelt, W.,  
701 and Ragimbeau, C. (2016). Human *Campylobacteriosis* in Luxembourg, 2010–2013: A Case-Control  
702 Study Combined with Multilocus Sequence Typing for Source Attribution and Risk Factor Analysis.  
703 *Scientific Reports*, *6*(1), 20939. <https://doi.org/10.1038/srep20939>
- 704 Mottet, A., and Tempio, G. (2017). Global poultry production: Current state and future outlook and challenges.  
705 *World's Poultry Science Journal*, *73*(2), 245–256. <https://doi.org/10.1017/S0043933917000071>

- 706 Mourkas, E., Florez-Cuadrado, D., Pascoe, B., Calland, J. K., Bayliss, S. C., Mageiros, L., Méric, G.,  
707 Hitchings, M. D., Quesada, A., Porrero, C., Ugarte-Ruiz, M., Gutiérrez-Fernández, J., Domínguez,  
708 L., and Sheppard, S. K. (2019). Gene pool transmission of multidrug resistance among *Campylobacter*  
709 from livestock, sewage and human disease. *Environmental Microbiology*, 21(12), 4597–4613.  
710 <https://doi.org/10.1111/1462-2920.14760>
- 711 Mourkas, E., Taylor, A. J., Méric, G., Bayliss, S. C., Pascoe, B., Mageiros, L., Calland, J. K., Hitchings, M. D.,  
712 Ridley, A., Vidal, A., Forbes, K. J., Strachan, N. J. C., Parker, C. T., Parkhill, J., Jolley, K. A., Cody,  
713 A. J., Maiden, M. C. J., Kelly, D. J., and Sheppard, S. K. (2020). Agricultural intensification and the  
714 evolution of host specialism in the enteric pathogen *Campylobacter jejuni*. *Proceedings of the National*  
715 *Academy of Sciences*, 117(20), 11018–11028. <https://doi.org/10.1073/pnas.1917168117>
- 716 NCBI Resource Coordinators. (2013). Database resources of the National Center for Biotechnology  
717 Information. *Nucleic Acids Research*, 41(D1), D8–D20. <https://doi.org/10.1093/nar/gks1189>
- 718 Nguyen, L.-T., Schmidt, H. A., von Haeseler, A., and Minh, B. Q. (2015). IQ-TREE: A fast and effective  
719 stochastic algorithm for estimating maximum-likelihood phylogenies. *Molecular Biology and*  
720 *Evolution*, 32(1), 268–274. <https://doi.org/10.1093/molbev/msu300>
- 721 Nichols, G. L., Richardson, J. F., Sheppard, S. K., Lane, C., and Sarran, C. (2012). *Campylobacter*  
722 epidemiology: A descriptive study reviewing 1 million cases in England and Wales between 1989 and  
723 2011. *BMJ Open*, 2(4), e001179. <https://doi.org/10.1136/bmjopen-2012-001179>
- 724 Olkkola, S., Nykäsenoja, S., Raulo, S., Llärena, A.-K., Kovanen, S., Kivistö, R., Myllyniemi, A.-L., and  
725 Hänninen, M.-L. (2016). Antimicrobial Resistance and Multilocus Sequence Types of Finnish  
726 *Campylobacter jejuni* Isolates from Multiple Sources. *Zoonoses and Public Health*, 63(1), 10–19.  
727 <https://doi.org/10.1111/zph.12198>
- 728 Pascoe, B., Méric, G., Yahara, K., Wimalarathna, H., Murray, S., Hitchings, M. D., Sproston, E. L., Carrillo, C.  
729 D., Taboada, E. N., Cooper, K. K., Huynh, S., Cody, A. J., Jolley, K. A., Maiden, M. C. J., McCarthy,  
730 N. D., Didelot, X., Parker, C. T., and Sheppard, S. K. (2017). Local genes for local bacteria: Evidence  
731 of allopatry in the genomes of transatlantic *Campylobacter* populations. *Molecular Ecology*, 26(17),  
732 4497–4508. <https://doi.org/10.1111/mec.14176>
- 733 Pascoe, B., Schiaffino, F., Murray, S., Méric, G., Bayliss, S. C., Hitchings, M. D., Mourkas, E., Calland, J. K.,  
734 Burga, R., Yori, P. P., Jolley, K. A., Cooper, K. K., Parker, C. T., Olortegui, M. P., Kosek, M. N., and  
735 Sheppard, S. K. (2020). Genomic epidemiology of *Campylobacter jejuni* associated with asymptomatic

- 736 pediatric infection in the Peruvian Amazon. *PLOS Neglected Tropical Diseases*, 14(8), e0008533.  
737 <https://doi.org/10.1371/journal.pntd.0008533>
- 738 Pascoe, B., Williams, L. K., Calland, J. K., Meric, G., Hitchings, M. D., Dyer, M., Ryder, J., Shaw, S., Lopes,  
739 B. S., Chintoan-Uta, C., Allan, E., Vidal, A., Fearnley, C., Everest, P., Pachebat, J. A., Cogan, T. A.,  
740 Stevens, M. P., Humphrey, T. J., Wilkinson, T. S., ... Sheppard, S. K. (2019). Domestication of  
741 *Campylobacter jejuni* NCTC 11168. *Microbial Genomics*, 5(7). <https://doi.org/10.1099/mgen.0.000279>
- 742 Peters, S., Pascoe, B., Wu, Z., Bayliss, S. C., Zeng, X., Edwinston, A., Veerabadrhan-Gurunathan, S., Jawahir,  
743 S., Calland, J. K., Mourkas, E., Patel, R., Wiens, T., Decuir, M., Boxrud, D., Smith, K., Parker, C. T.,  
744 Farrugia, G., Zhang, Q., Sheppard, S. K., and Grover, M. (2021). *Campylobacter jejuni* genotypes are  
745 associated with post-infection irritable bowel syndrome in humans. *Communications Biology*, 4(1), 1–  
746 17. <https://doi.org/10.1038/s42003-021-02554-8>
- 747 Platts-Mills, J. A., and Kosek, M. (2014). Update on the burden of *Campylobacter* in developing countries.  
748 *Current Opinion in Infectious Diseases*, 27(5), 444–450.  
749 <https://doi.org/10.1097/QCO.0000000000000091>
- 750 Prachantasena, S., Charununtakorn, P., Muangnoicharoen, S., Hankla, L., Techawal, N., Chaveerach, P.,  
751 Tuitemwong, P., Chokesajjawatee, N., Williams, N., Humphrey, T., and Luangtongkum, T. (2016).  
752 Distribution and Genetic Profiles of *Campylobacter* in Commercial Broiler Production from Breeder to  
753 Slaughter in Thailand. *PLoS One*, 11(2), e0149585. <https://doi.org/10.1371/journal.pone.0149585>
- 754 Ramonaite, S., Kudirkienė, E., Tamulevičienė, E., Levinienė, G., Malakauskas, A., Gölz, G., Alter, T., and  
755 Malakauskas, M. (2014). Prevalence and genotypes of *Campylobacter jejuni* from urban environmental  
756 sources in comparison with clinical isolates from children. *Journal of Medical Microbiology*.  
757 <https://doi.org/10.1099/jmm.0.072892-0>
- 758 Rao, M. R. (2001). Pathogenicity and Convalescent Excretion of *Campylobacter* in Rural Egyptian Children.  
759 *American Journal of Epidemiology*, 154(2), 166–173. <https://doi.org/10.1093/aje/154.2.166>
- 760 Reed, R. P., Friedland, I. R., Wegerhoff, F. O., and Khoosal, M. (1996). *Campylobacter* bacteremia in children:  
761 *The Pediatric Infectious Disease Journal*, 15(4), 345–348. [https://doi.org/10.1097/00006454-](https://doi.org/10.1097/00006454-199604000-00012)  
762 [199604000-00012](https://doi.org/10.1097/00006454-199604000-00012)
- 763 Revez, J., Rossi, M., Ellström, P., Haan, C. de, Rautelin, H., and Hänninen, M.-L. (2011). Finnish  
764 *Campylobacter jejuni* Strains of Multilocus Sequence Type ST-22 Complex Have Two Lineages with  
765 Different Characteristics. *PLOS ONE*, 6(10), e26880. <https://doi.org/10.1371/journal.pone.0026880>

- 766 Sabry, N. A., Farid, S. F., and Dawoud, D. M. (2014). Antibiotic dispensing in Egyptian community  
767 pharmacies: An observational study. *Research in Social and Administrative Pharmacy*, 10(1), 168–  
768 184. <https://doi.org/10.1016/j.sapharm.2013.03.004>
- 769 Sarhangi, M., Bakhshi, B., and Peeraeyeh, S. N. (2021). High prevalence of *Campylobacter jejuni* CC21 and  
770 CC257 clonal complexes in children with gastroenteritis in Tehran, Iran. *BMC Infectious Diseases*,  
771 21(1), 108. <https://doi.org/10.1186/s12879-021-05778-5>
- 772 Seemann, T. (2014). Prokka: Rapid prokaryotic genome annotation. *Bioinformatics*, 30(14), 2068–2069.  
773 <https://doi.org/10.1093/bioinformatics/btu153>
- 774 Sheppard, S. K., Cheng, L., Méric, G., de Haan, C. P. A., Llarena, A.-K., Martinen, P., Vidal, A., Ridley, A.,  
775 Clifton-Hadley, F., Connor, T. R., Strachan, N. J. C., Forbes, K., Colles, F. M., Jolley, K. A., Bentley,  
776 S. D., Maiden, M. C. J., Hänninen, M.-L., Parkhill, J., Hanage, W. P., and Corander, J. (2014). Cryptic  
777 ecology among host generalist *Campylobacter jejuni* in domestic animals. *Molecular Ecology*, 23(10),  
778 2442–2451. <https://doi.org/10.1111/mec.12742>
- 779 Sheppard, S. K., Dallas, J. F., MacRae, M., McCarthy, N. D., Sproston, E. L., Gormley, F. J., Strachan, N. J. C.,  
780 Ogden, I. D., Maiden, M. C. J., and Forbes, K. J. (2009). *Campylobacter* genotypes from food animals,  
781 environmental sources and clinical disease in Scotland 2005/6. *International Journal of Food*  
782 *Microbiology*, 134(1–2), 96–103. <https://doi.org/10.1016/j.ijfoodmicro.2009.02.010>
- 783 Sheppard, S. K., Dallas, J. F., Strachan, N. J. C., MacRae, M., McCarthy, N. D., Wilson, D. J., Gormley, F. J.,  
784 Falush, D., Ogden, I. D., Maiden, M. C. J., and Forbes, K. J. (2009). *Campylobacter* Genotyping to  
785 Determine the Source of Human Infection. *Clinical Infectious Diseases*.  
786 <https://doi.org/10.1086/597402>
- 787 Sheppard, S. K., Dallas, J. F., Wilson, D. J., Strachan, N. J. C., McCarthy, N. D., Jolley, K. A., Colles, F. M.,  
788 Rotariu, O., Ogden, I. D., Forbes, K. J., and Maiden, M. C. J. (2010). Evolution of an Agriculture-  
789 Associated Disease Causing *Campylobacter coli* Clade: Evidence from National Surveillance Data in  
790 Scotland. *PLoS ONE*, 5(12), e15708. <https://doi.org/10.1371/journal.pone.0015708>
- 791 Sheppard, S. K., Didelot, X., Jolley, K. A., Darling, A. E., Pascoe, B., Méric, G., Kelly, D. J., Cody, A., Colles,  
792 F. M., Strachan, N. J. C., Ogden, I. D., Forbes, K., French, N. P., Carter, P., Miller, W. G., McCarthy,  
793 N. D., Owen, R., Litrup, E., Egholm, M., ... Falush, D. (2013). Progressive genome-wide  
794 introgression in agricultural *Campylobacter coli*. *Molecular Ecology*, 22(4), 1051–1064.  
795 <https://doi.org/10.1111/mec.12162>

- 796 Sheppard, S. K., Jolley, K. A., and Maiden, M. C. J. (2012). A Gene-By-Gene Approach to Bacterial Population  
797 Genomics: Whole Genome MLST of *Campylobacter*. *Genes*, 3(2), 261–277.  
798 <https://doi.org/10.3390/genes3020261>
- 799 Sheppard, S. K., McCarthy, N. D., Falush, D., and Maiden, M. C. J. (2008). Convergence of *Campylobacter*  
800 Species: Implications for Bacterial Evolution. *Science*, 320(5873), 237–239.  
801 <https://doi.org/10.1126/science.1155532>
- 802 Shin, E., Oh, Y., Kim, M., Jung, J., and Lee, Y. (2013). Antimicrobial Resistance Patterns and Corresponding  
803 Multilocus Sequence Types of the *Campylobacter jejuni* Isolates from Human Diarrheal Samples.  
804 *Microbial Drug Resistance*, 19(2), 110–116. <https://doi.org/10.1089/mdr.2012.0099>
- 805 Sopwith, W., Birtles, A., Matthews, M., Fox, A., Gee, S., Painter, M., Regan, M., Syed, Q., and Bolton, E.  
806 (2008). Identification of Potential Environmentally Adapted *Campylobacter jejuni* Strain, United  
807 Kingdom. *Emerging Infectious Diseases*, 14(11), 1769–1773. <https://doi.org/10.3201/eid1411.071678>
- 808 Suerbaum, S., Lohrengel, M., Sonnevend, A., Ruberg, F., and Kist, M. (2001). Allelic diversity and  
809 recombination in *Campylobacter jejuni*. *Journal of Bacteriology*.  
810 <https://doi.org/10.1128/JB.183.8.2553-2559.2001>
- 811 Tam, C. C., O'Brien, S. J., Tompkins, D. S., Bolton, F. J., Berry, L., Dodds, J., Choudhury, D., Halstead, F.,  
812 Iturriza-Gomara, M., Mather, K., Rait, G., Ridge, A., Rodrigues, L. C., Wain, J., Wood, B., Gray, J. J.,  
813 and the IID2 Study Executive Committee. (2012). Changes in Causes of Acute Gastroenteritis in the  
814 United Kingdom Over 15 Years: Microbiologic Findings From 2 Prospective, Population-Based  
815 Studies of Infectious Intestinal Disease. *Clinical Infectious Diseases*, 54(9), 1275–1286.  
816 <https://doi.org/10.1093/cid/cis028>
- 817 The European Union Summary Report on Antimicrobial Resistance in zoonotic and indicator bacteria from  
818 humans, animals and food in 2018/2019. (2021). *EFSA Journal* 2021; 19(4):6490, 179 pp.  
819 <https://doi.org/10.2903/j.efsa.2021.6490>
- 820 Thépault, A., Rose, V., Quesne, S., Poezevara, T., Béven, V., Hirchaud, E., Touzain, F., Lucas, P., Méric, G.,  
821 Mageiros, L., Sheppard, S. K., Chemaly, M., and Rivoal, K. (2018). Ruminant and chicken: Important  
822 sources of campylobacteriosis in France despite a variation of source attribution in 2009 and 2015.  
823 *Scientific Reports*, 8(1), 9305. <https://doi.org/10.1038/s41598-018-27558-z>
- 824 Waite, D. W., and Taylor, M. W. (2015). Exploring the avian gut microbiota: Current trends and future  
825 directions. *Frontiers in Microbiology*, 6. <https://doi.org/10.3389/fmicb.2015.00673>



- 826 Wallace, R. L., Cribb, D. M., Bulach, D. M., Ingle, D. J., Joensen, K. G., Nielsen, E. M., Leekitcharoenphon, P.,  
827 Stingl, K., and Kirk, M. D. (2021). *Campylobacter jejuni* ST50, a pathogen of global importance: A  
828 comparative genomic analysis of isolates from Australia, Europe and North America. *Zoonoses and*  
829 *Public Health*. <https://doi.org/10.1111/zph.12853>
- 830 Wiczorek, K., Denis, E., Lachtara, B., and Osek, J. (2017). Distribution of *Campylobacter jejuni* multilocus  
831 sequence types isolated from chickens in Poland. *Poultry Science*. <https://doi.org/10.3382/ps/pew343>
- 832 Wierzba, T. F., Abdel-Messih, I. A., Gharib, B., Baqar, S., Hendaui, A., Khalil, I., Omar, T. A., Khayat, H. E.,  
833 Putnam, S. D., Sanders, J. W., Ng, L.-K., Price, L. J., Scott, D. A., and Frenck, R. R. (2008).  
834 *Campylobacter* Infection as a Trigger for Guillain-Barré Syndrome in Egypt. *PLoS ONE*, 3(11), e3674.  
835 <https://doi.org/10.1371/journal.pone.0003674>
- 836 Zankari, E., Allesøe, R., Joensen, K. G., Cavaco, L. M., Lund, O., and Aarestrup, F. M. (2017). PointFinder: A  
837 novel web tool for WGS-based detection of antimicrobial resistance associated with chromosomal  
838 point mutations in bacterial pathogens. *Journal of Antimicrobial Chemotherapy*, 72(10), 2764–2768.  
839 <https://doi.org/10.1093/jac/dkx217>
- 840 Zhang, P., Zhang, X., Liu, Y., Jiang, J., Shen, Z., Chen, Q., and Ma, X. (2020). Multilocus Sequence Types and  
841 Antimicrobial Resistance of *Campylobacter jejuni* and *C. coli* Isolates of Human Patients From  
842 Beijing, China, 2017–2018. *Frontiers in Microbiology*, 11. <https://doi.org/10.3389/fmicb.2020.554784>
- 843 Zhang, T., Luo, Q., Chen, Y., Li, T., Wen, G., Zhang, R., Luo, L., Lu, Q., Ai, D., Wang, H., and Shao, H.  
844 (2016). Molecular epidemiology, virulence determinants and antimicrobial resistance of  
845 *Campylobacter* spreading in retail chicken meat in Central China. *Gut Pathogens*.  
846 <https://doi.org/10.1186/s13099-016-0132-2>
- 847 Zhao, S., Tyson, G. H., Chen, Y., Li, C., Mukherjee, S., Young, S., Lam, C., Folster, J. P., Whichard, J. M., and  
848 McDermott, P. F. (2016). Whole-Genome Sequencing Analysis Accurately Predicts Antimicrobial  
849 Resistance Phenotypes in *Campylobacter* spp. *Applied and Environmental Microbiology*, 82(2), 459–  
850 466. <https://doi.org/10.1128/AEM.02873-15>
- 851 Zollner-Schwetz, I., and Krause, R. (2015). Therapy of acute gastroenteritis: Role of antibiotics. *Clinical*  
852 *Microbiology and Infection*, 21(8), 744–749. <https://doi.org/10.1016/j.cmi.2015.03.002>
- 853

## 854 Tables and Figures

855 **Figure 1:** (A) Demographic data for Cairo, Egypt from which we collected *Campylobacter spp.*  
856 isolates (n=112; red circles) from clinical cases, broiler carcasses and dairy products collected over a  
857 14-month sampling period. Our collection was compared to a similar published survey from Oxford,  
858 UK (n=874; green circles; Cody et al. 2012) and isolates from pubMLST.org (n=204; grey circles) for  
859 additional genetic context. (B) Clonal complexes (CCs) of isolates collected from Cairo were ranked  
860 according to the frequency in our local dataset and how often they have been sampled from human  
861 disease isolates (data from pubMLST; <https://pubmlst.org/>). Alignments were made from  
862 concatenated gene sequences of all core genes (found in  $\geq 95\%$  isolates) using MAFFT (version 7;  
863 Katoh and Standley 2013) on a gene-by-gene basis. Separate maximum-likelihood phylogenies were  
864 constructed with a GTR+I+G substitution model and ultra-fast bootstrapping (1000 bootstraps)  
865 (Hoang et al., 2018) implemented in IQ-TREE (version 1.6.8; Nguyen et al. 2015) for (C) *C. jejuni*  
866 (n=1,048) and (D) *C. coli* (n=132) and visualized on Microreact  
867 ([https://next.microreact.org/project/Cjejuni\\_Egypt](https://next.microreact.org/project/Cjejuni_Egypt); [https://next.microreact.org/project/Ccoli\\_Egypt](https://next.microreact.org/project/Ccoli_Egypt))  
868 (Argimón et al., 2016).

869

870 **Figure 2:** (A) Core genome variation between isolates was quantified by calculating the pairwise  
871 average nucleotide identity (ANI) of all UK and Oxford *Campylobacter* genomes (n=112+874) using  
872 FastANI v.1.058 (Jain et al., 2018). (B) The ANI for each isolate was estimated and averages  
873 compared within and between countries. (C) The gene presence matrix produced by PIRATE was  
874 used to generate a heatmap of shared pairwise accessory genome genes. (D) Averages were calculated  
875 for within and between country. (E) Clustering of pairwise core and accessory genome distances were  
876 compared using PopPunk. Interactive visualisation on Microreact:  
877 <https://microreact.org/project/Campy-Egypt>. (F) Comparisons of within and between country ANI  
878 and accessory gene sharing were also analysed for our two most common Egyptian lineages, ST21 (*C.*  
879 *jejuni*) and ST828 (*C. coli*) clonal complexes.

880

881 **Figure 3:** (A) Sub-tree of all Egyptian and UK ST21 clonal complex (CC21) isolates (n=251).  
882 Common sequence types are annotated and ST50 (yellow) and ST21 (green) are highlighted. (B)  
883 Within clonal complex clustering of pairwise core and accessory genome distances with PopPunk. (C)  
884 Prevalence of the most common sequence types found within CC21. (D) Prevalence of AMR  
885 determinants grouped by antibiotic class for each CC21 ST. (E) Prevalence of MDR isolates (AMR  
886 determinants for three or more antibiotic classes) in CC21 STs.

887

888 **Figure 4:** (A) Sub-tree of all Egyptian and UK ST828 clonal complex (CC828) isolates (n=94).  
889 Common sequence types are annotated and ST827 (orange) is highlighted. (B) Within clonal complex  
890 clustering of pairwise core and accessory genome distances with PopPunk. (C) Prevalence of the most  
891 common sequence types found within CC828. (D) Prevalence of AMR determinants grouped by  
892 antibiotic class for each CC828 ST. (E) Prevalence of MDR isolates (AMR determinants for three or  
893 more antibiotic classes) in CC828 STs.

894

### 895 **Supplementary information**

896 **Supplementary table 1:** Summary of isolate collection data and genome statistics

897 **Supplementary table 2:** Summary PIRATE core and accessory genome statistics.

898 **Supplementary table 3:** Summary of AMR genes identified by comparison with the NCBI database  
899 and pointfinder.

900

**A**

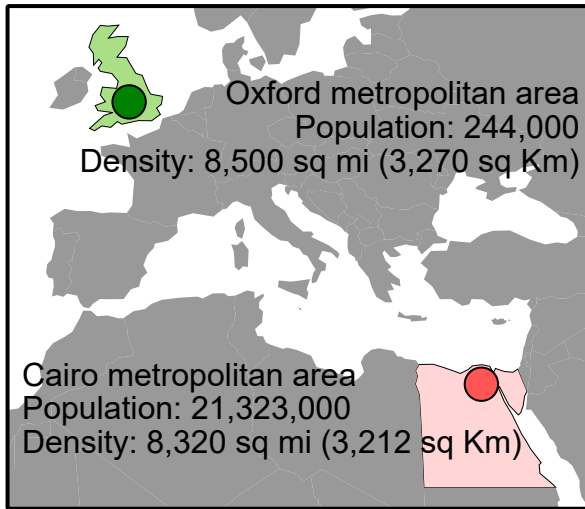

**B**

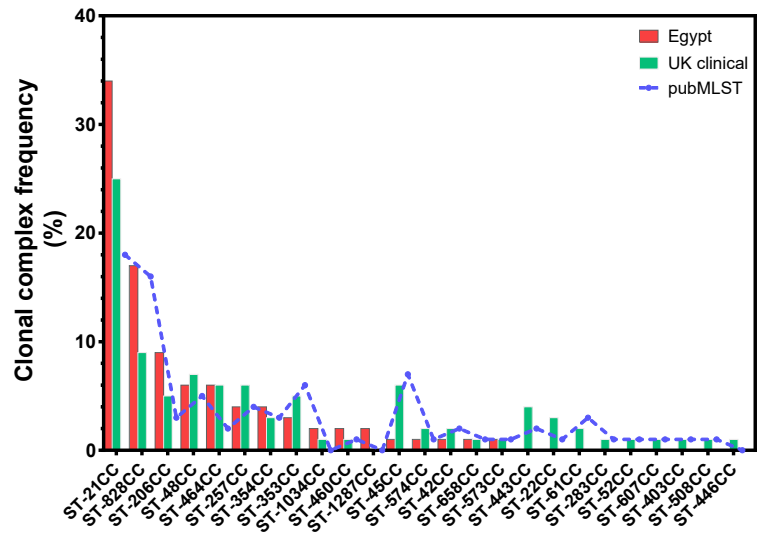

**C**

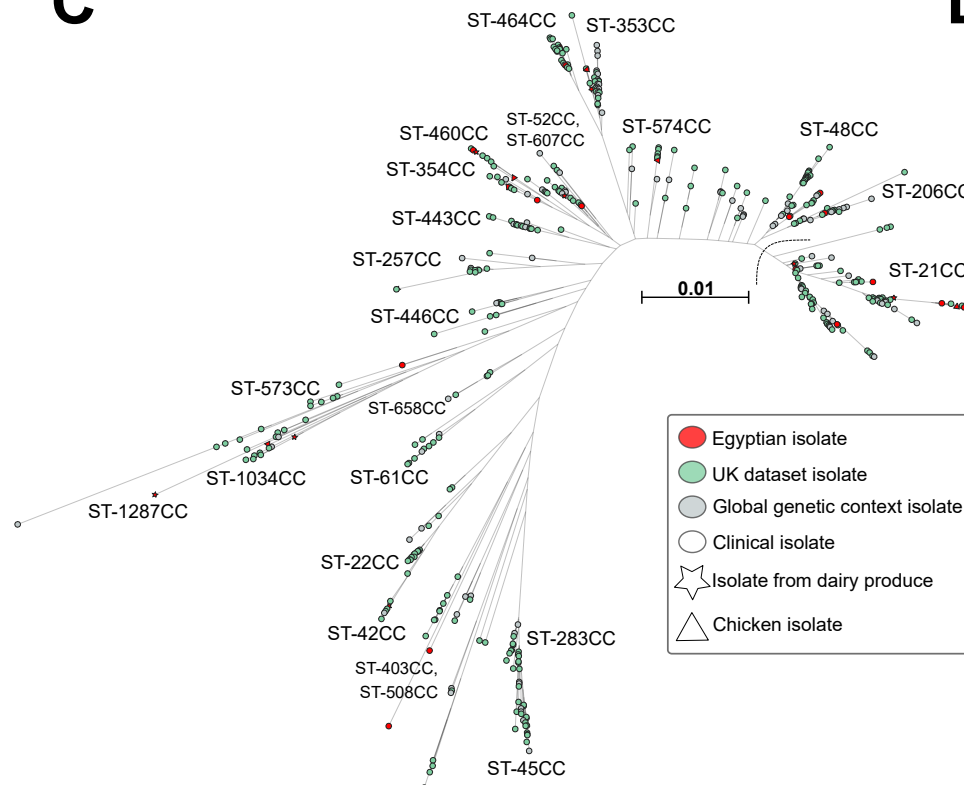

**D**

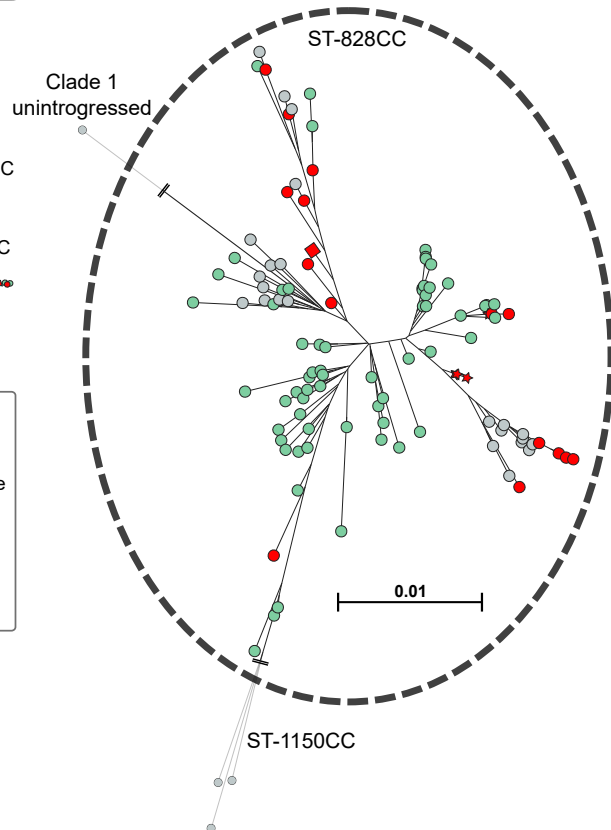

Egyptian isolates (n=112)  
Collected 2017-18

Oxford comparison (n=874)  
2011-12 (Cody et al; 2012)

Genetic context (n=204)  
2017-18 (pubMLST.org)

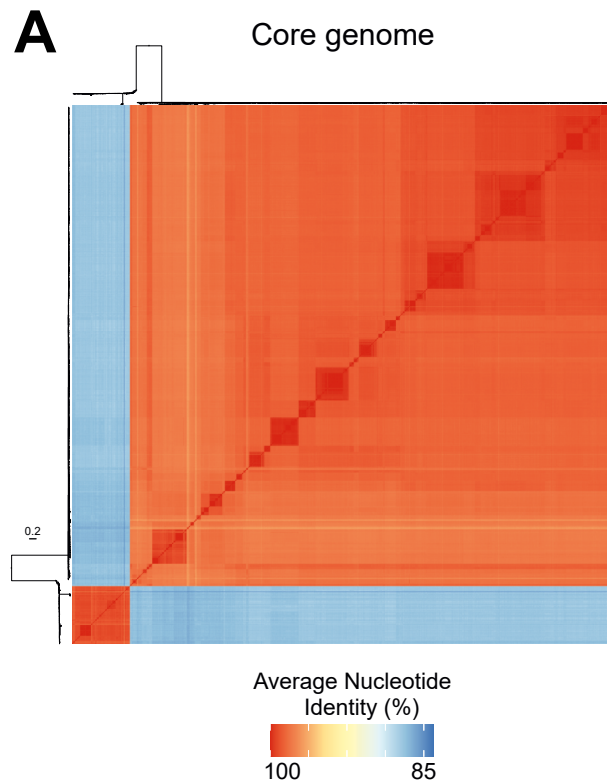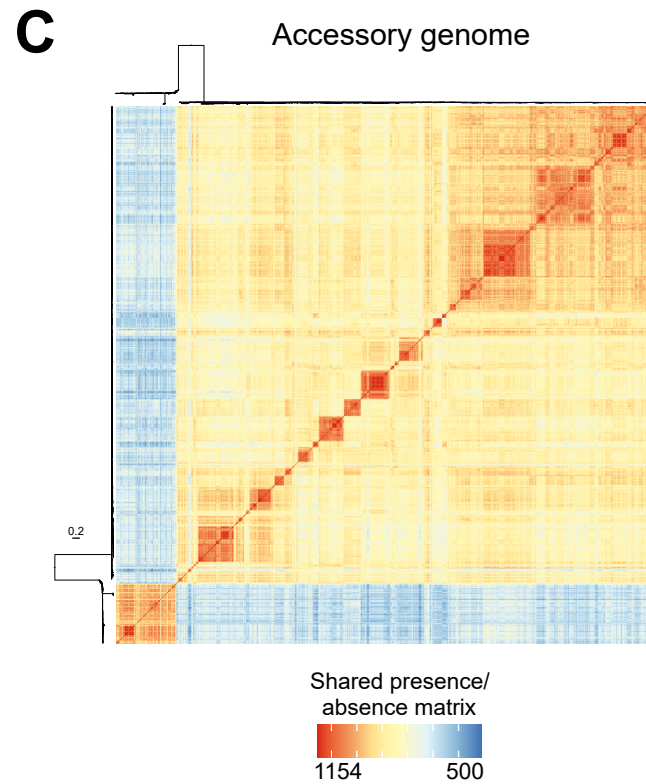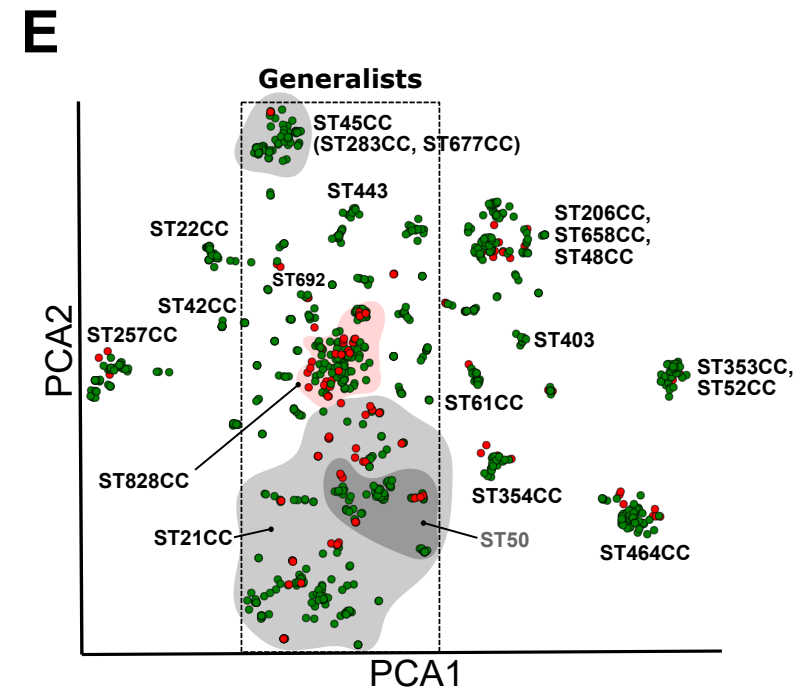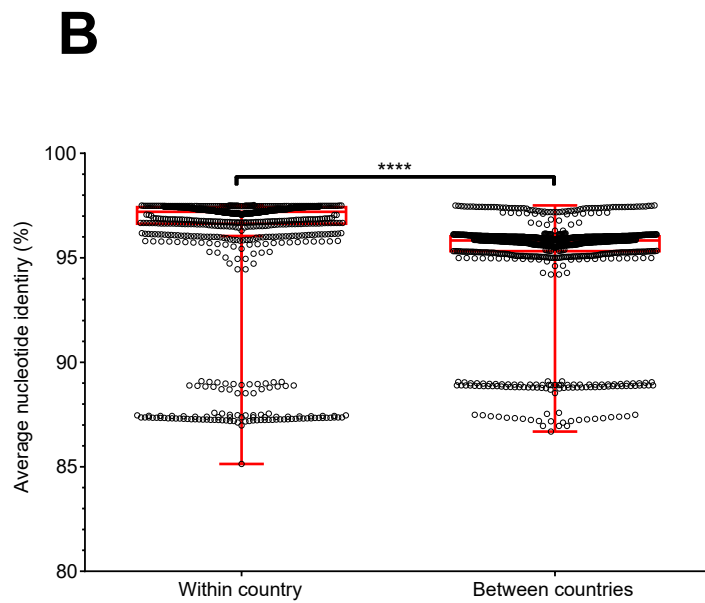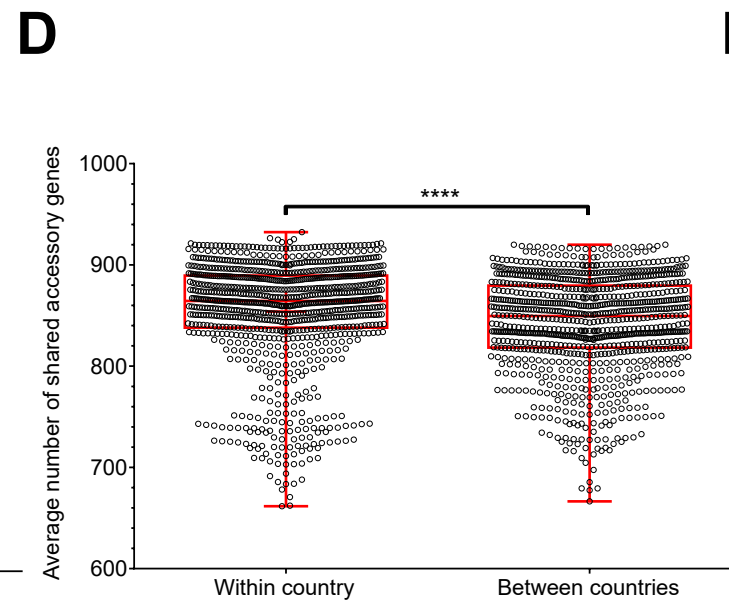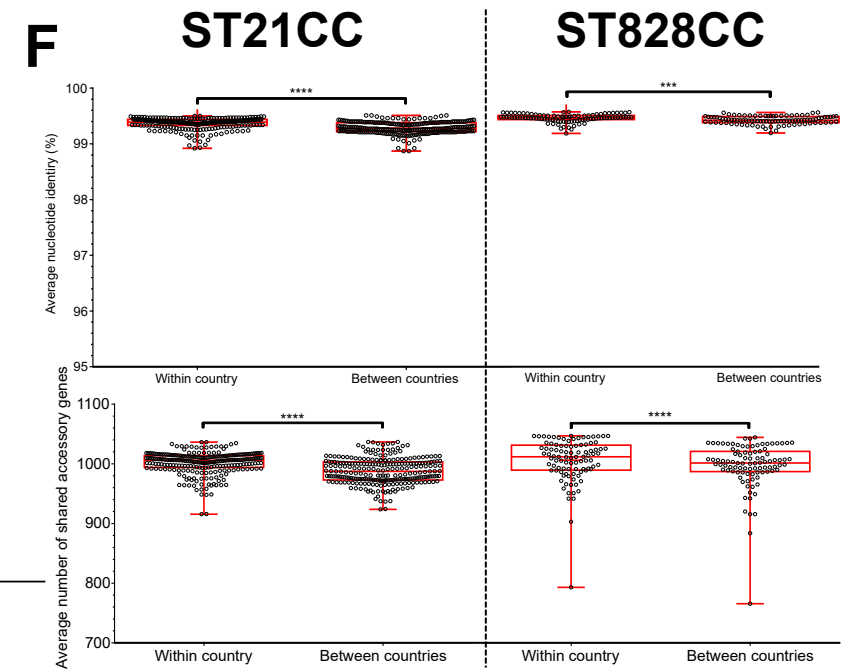

**A**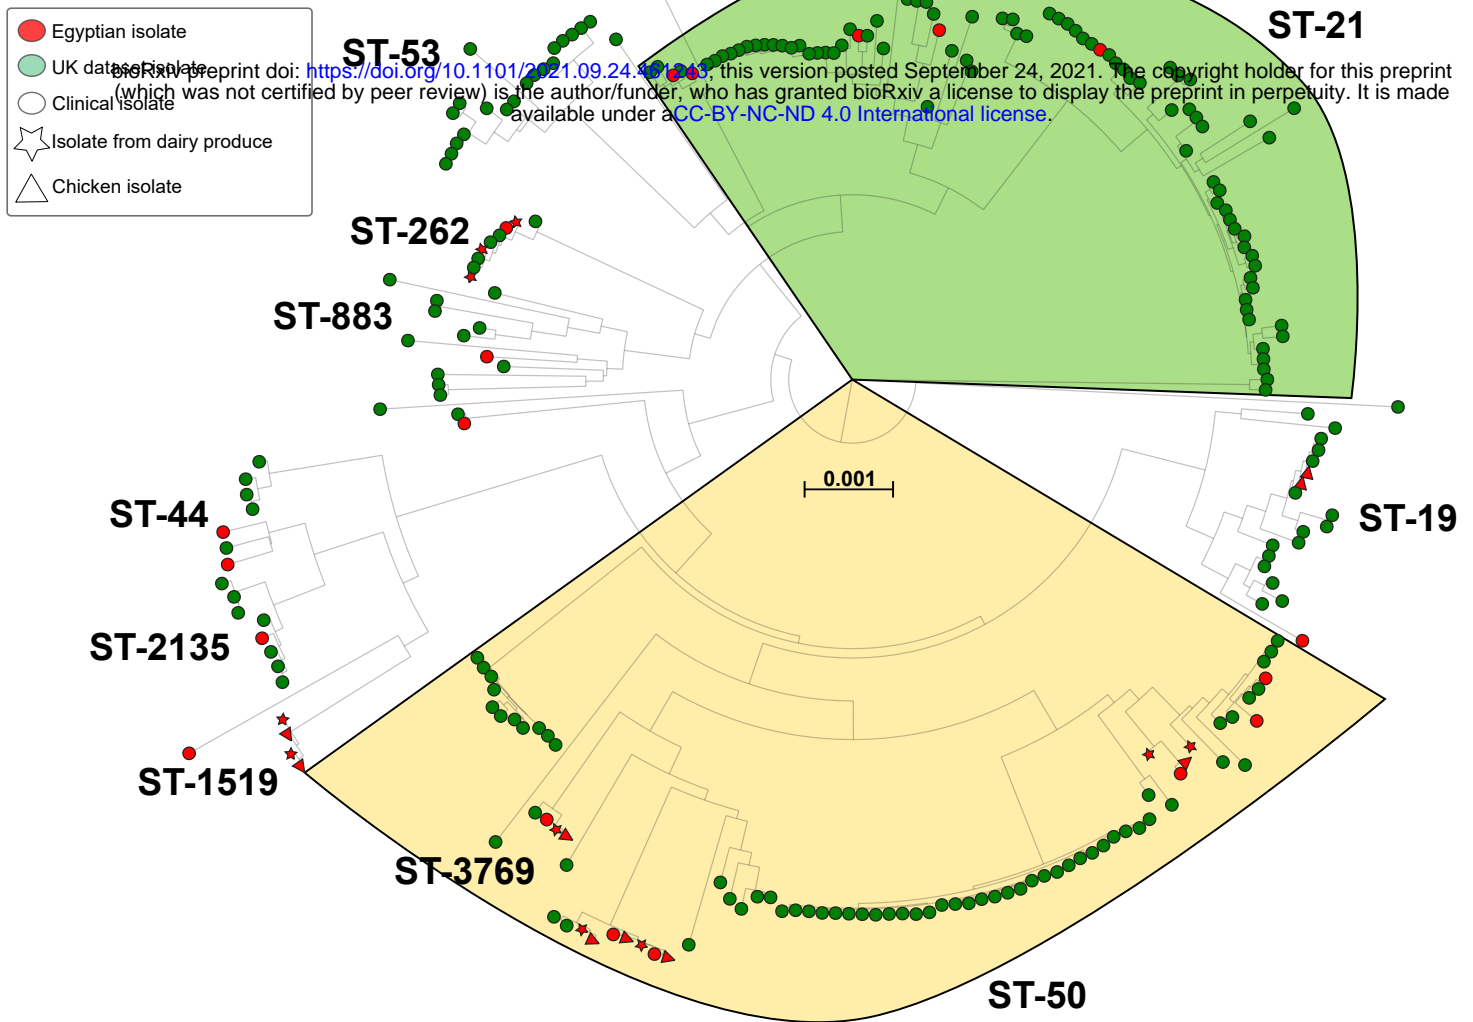**B**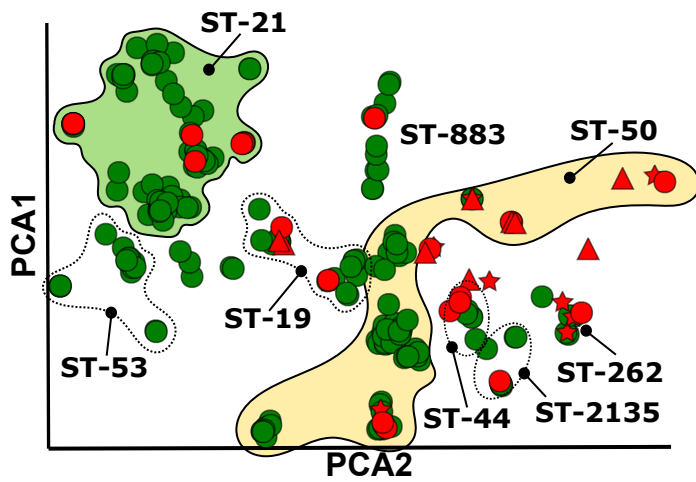**D**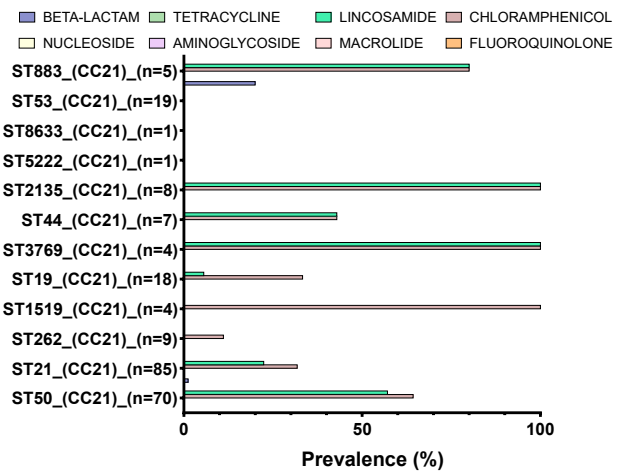**C**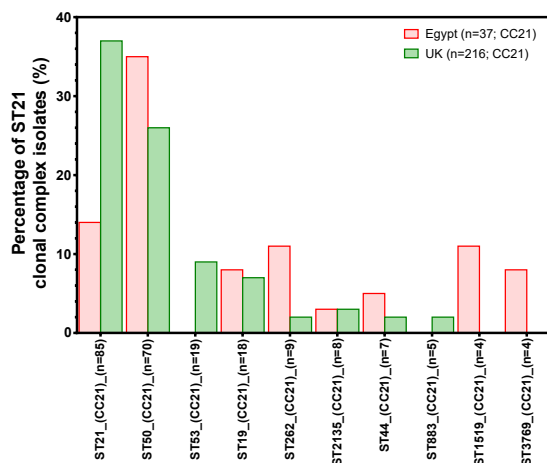**E**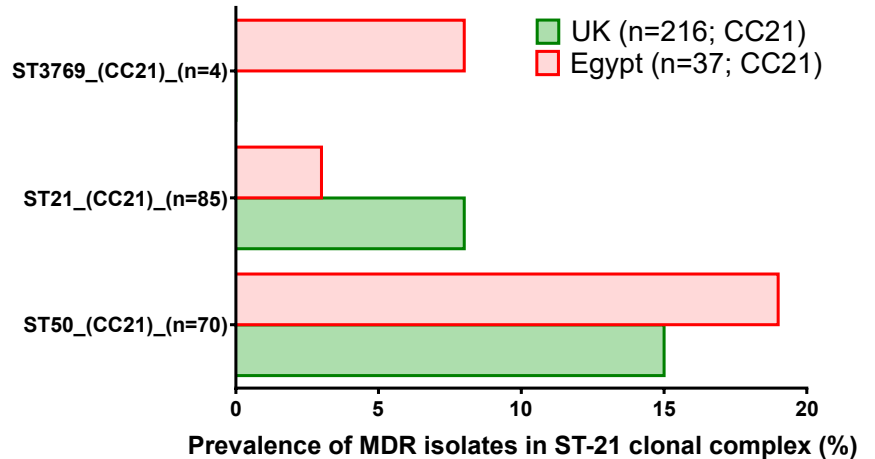

**A**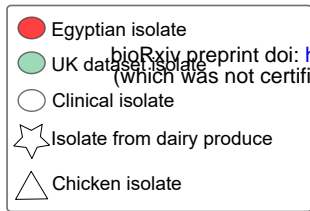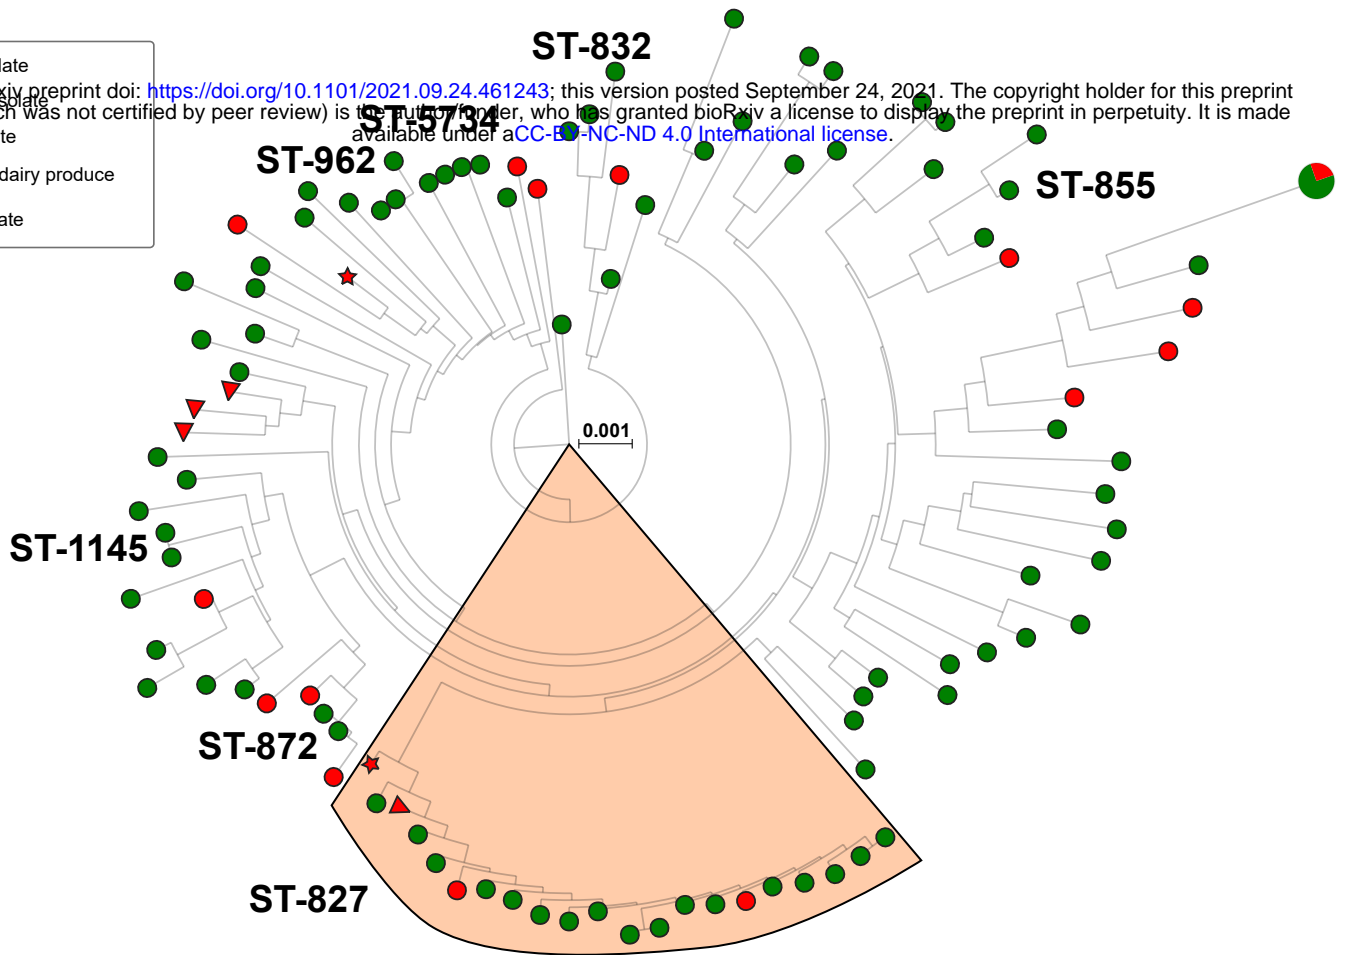**B**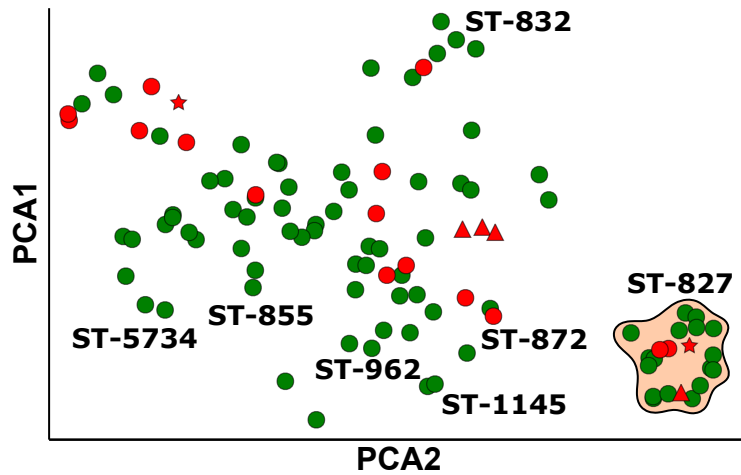**D**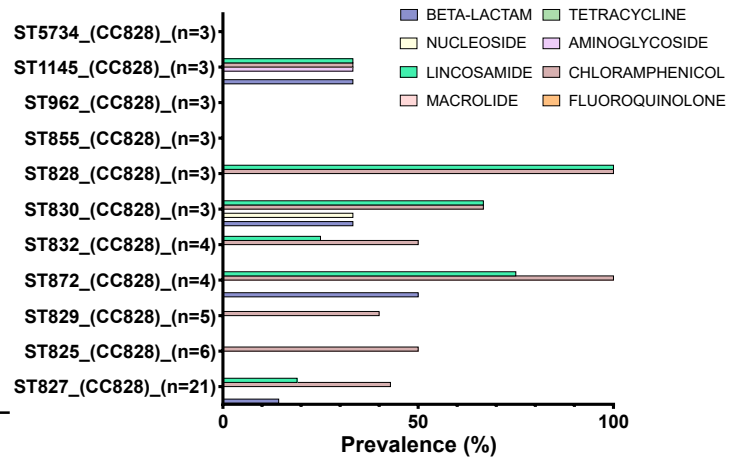**C**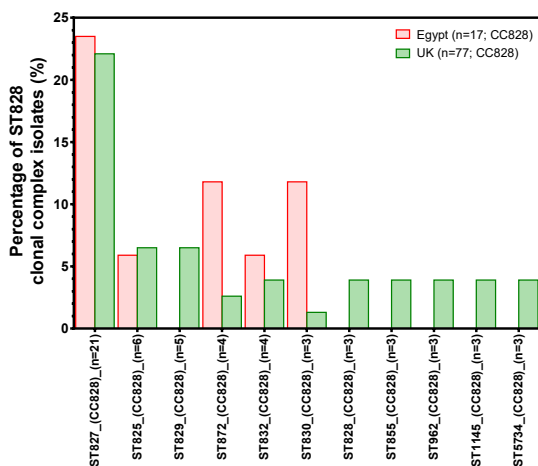**E**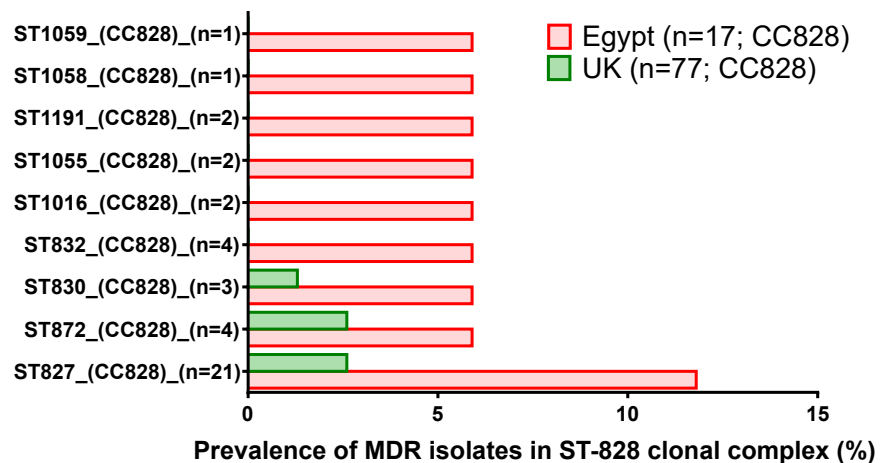

Source: https://www.biorxiv.org/content/10.1101/2021.09.24.461243.full.pdf
